# Supplementary material
Source: PubMed Central journal article supplement (PMC3094113)
Supplement: emboj201143s1.pdf [file emboj201143s1.pdf]

# **Supplementary Information**

**The RSC chromatin remodeling enzyme plays a unique role in directing the accurate positioning of promoter nucleosomes**

Wippo CJ, Israel L, Watanabe S, Hochheimer A, Peterson CL, Korber P

**Supplementary Figures S1-S8**

**Supplementary Tables S1, S3 and S4**

**Supplementary Materials and Methods**

**Supplementary References**

## Supplementary Figures

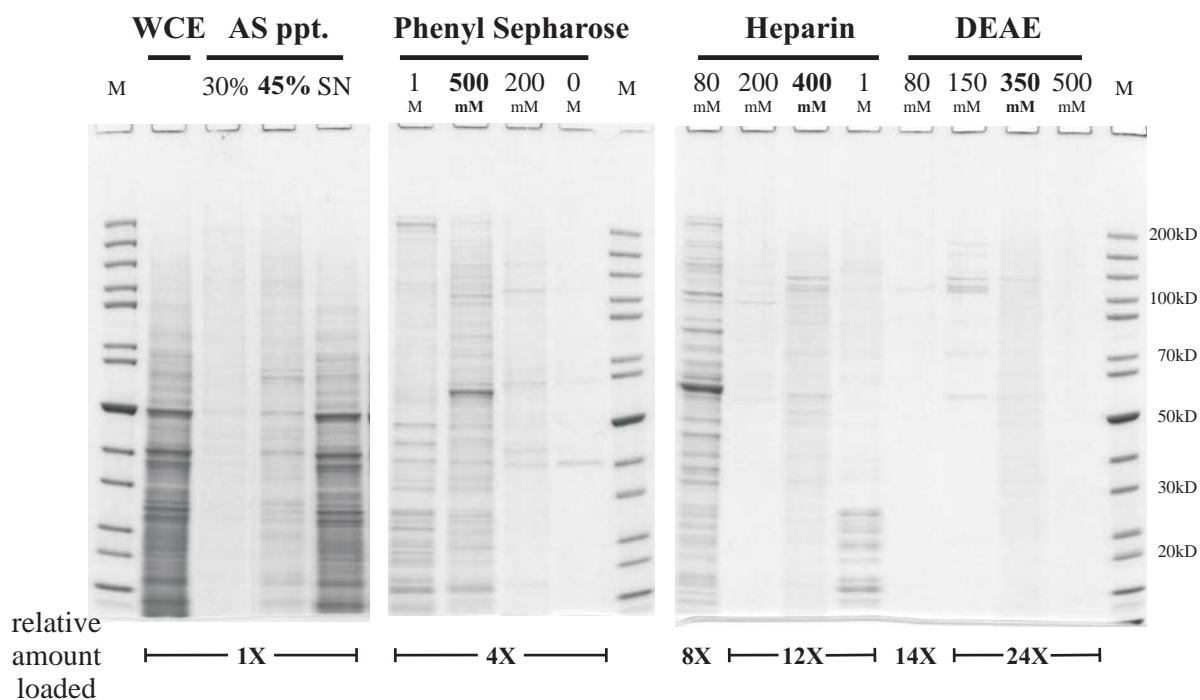

**Supplementary Figure S1** Fractionation of the yeast whole cell extract over four sequential steps removes a majority of proteins. Analysis of the protein content of WCE and fractions obtained from each purification step as in Figure 1B on a 4-12% acrylamide SDS gel stained with colloidal coomassie. 1  $\mu$ l of WCE was loaded and the relative amount indicated below the lanes of the fractions, such that the volume increase relative to input was compensated. Fractions positive for the *PHO8* promoter nucleosome positioning activity are labeled in bold. Sizes of some marker bands are indicated on the right. AS ppt., ammonium sulphate precipitation. SN, supernatant.

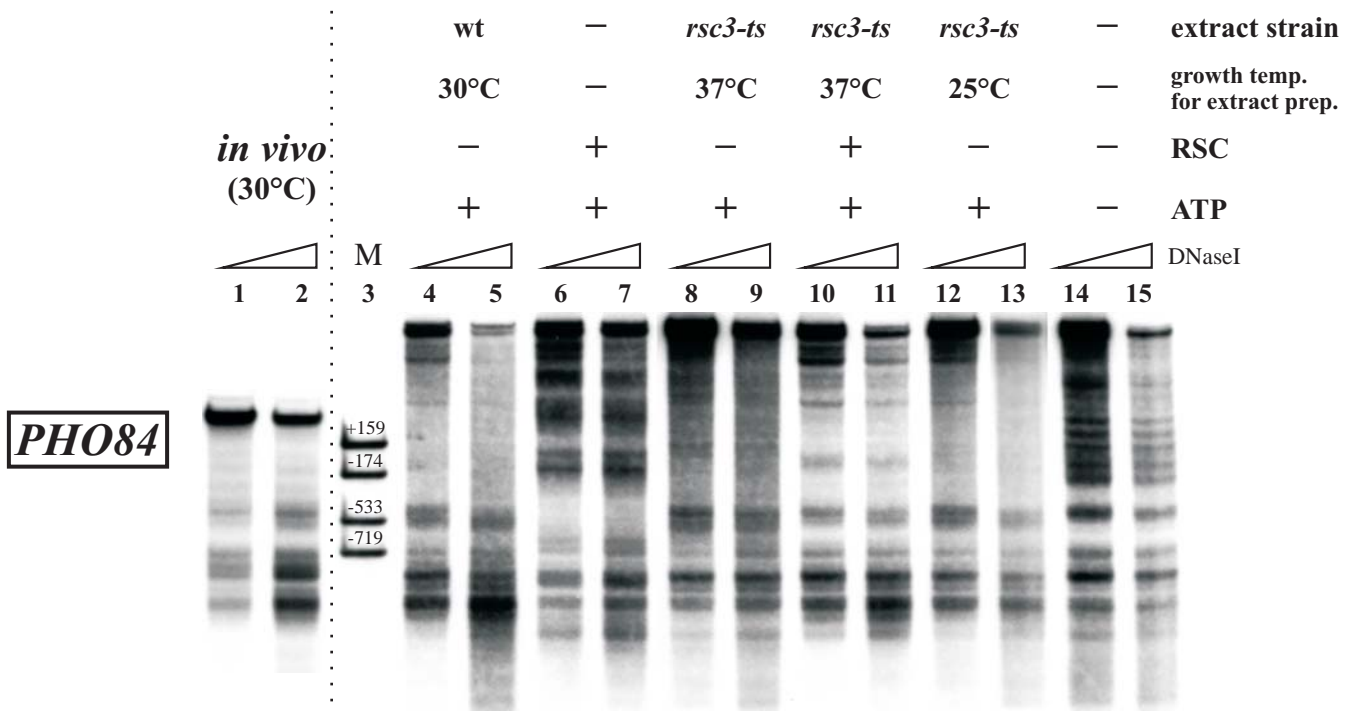

**Supplementary Figure S2** The *in vivo*-like positioning at the *PHO84* promoter generated by salt gradient dialysis assembly is counteracted by RSC alone but not in the context of the *rsc3-ts* 37 °C extract. As Figure 3, but with plasmid pUC19-*PHO84*. The *in vivo* sample was electrophoresed on a separate gel as indicated by the stippled line. For the *in vivo* sample secondary cleavage was with HindIII instead of SspI so that the top band migrates lower in the lane.

# PHO8

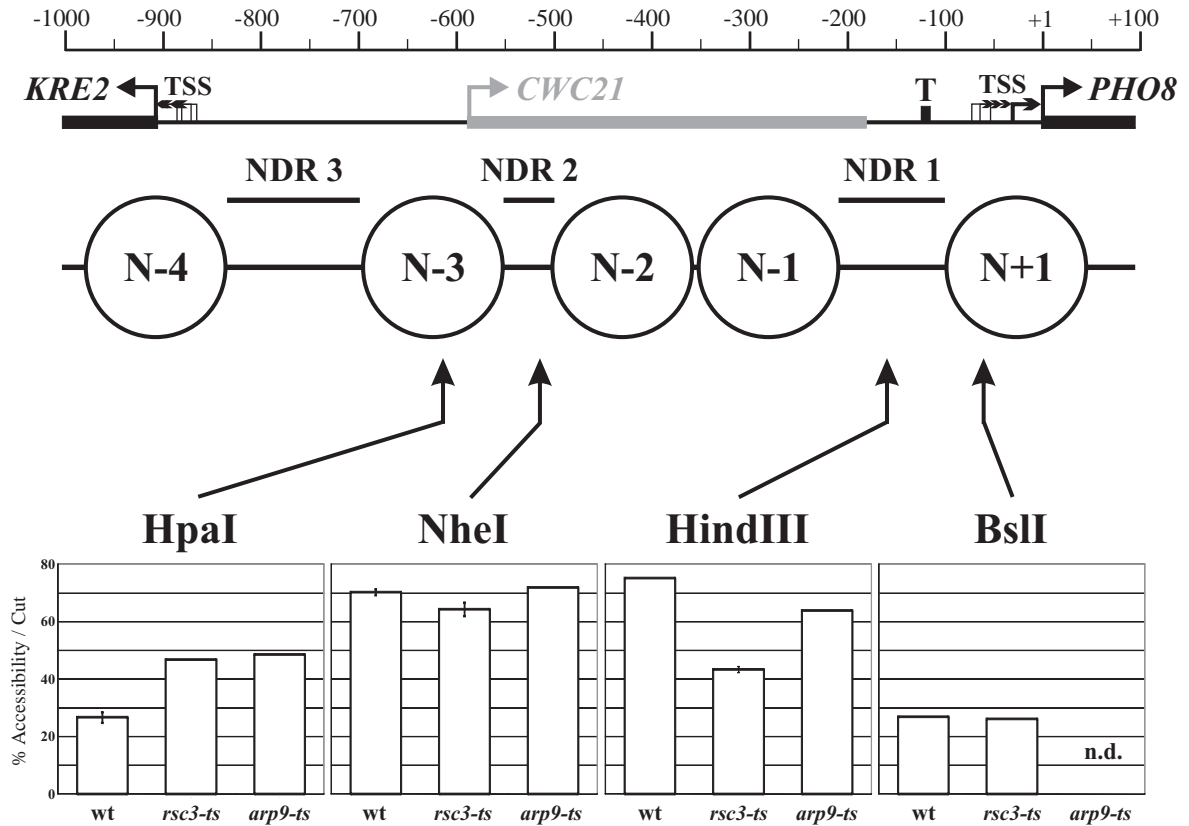

**Supplementary Figure S3** Ablation of RSC subunits changed restriction enzyme accessibilities at the *PHO8* promoter. Nuclei isolated from wildtype (wt; BY4741) and *ts* (*rsc3-ts* (TH8247) and *arp9-ts* (YBC1536)) strains as in Figure 5 after overnight incubation at 37 °C were digested with the indicated restriction enzymes. Schematics of the *PHO8* promoter as in Figure 1A. Arrows indicate the position of the corresponding restriction site. Error bars show the variation of two biological replicates. n.d. not determined.

**A****PHO8**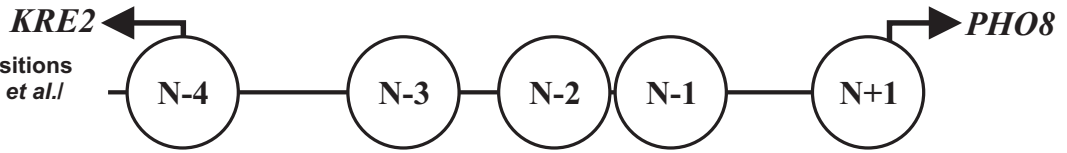

Nucleosome Positions  
acc. to Barbaric *et al.*/  
Jiang and Pugh

Badis *et al.* Rsc3 sites

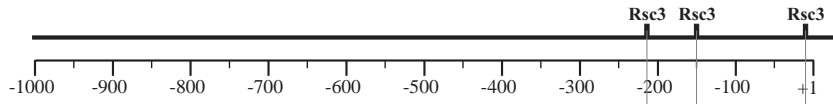

Badis *et al.*  
*rsc3-ts* / WT

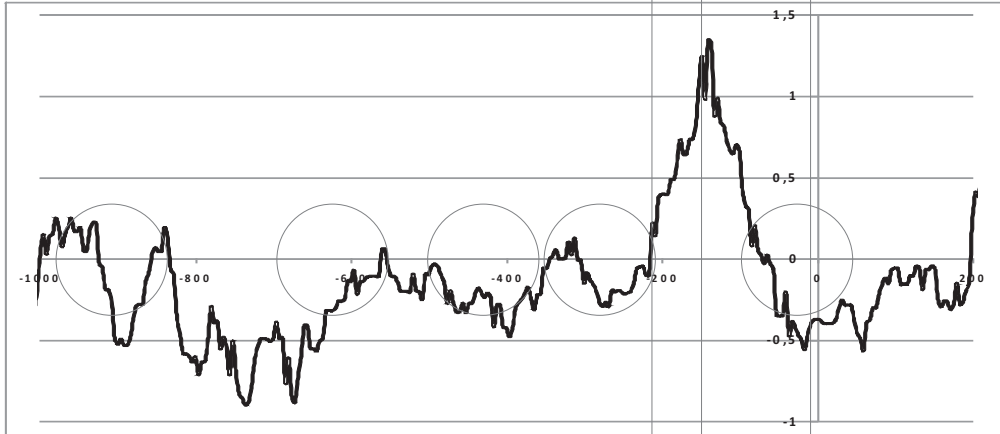

Parnell *et al.*  
nucleosome  
occupancy

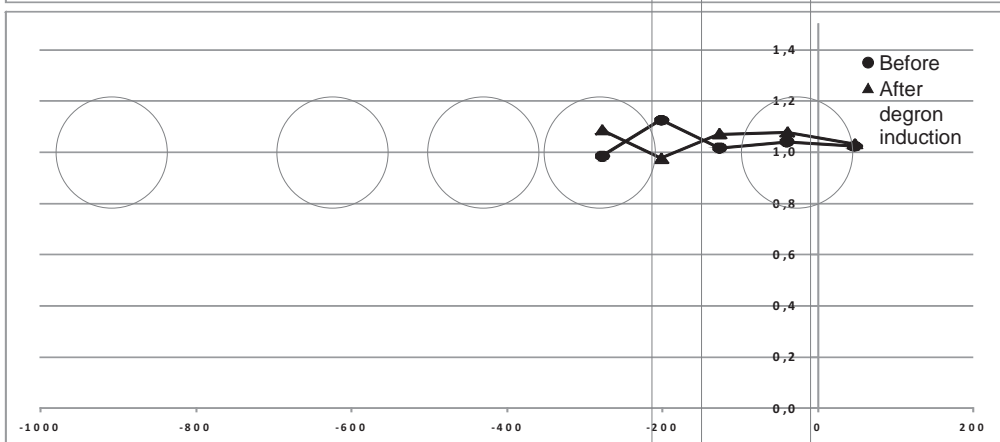

Parnell *et al.*  
Rsc3/Rsc8  
enrichment

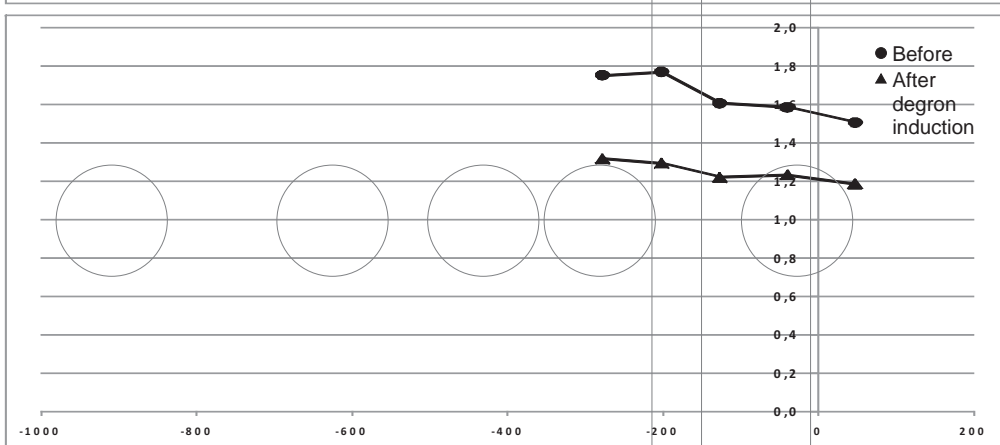

Venters *et al.*  
Rsc9  
enrichment

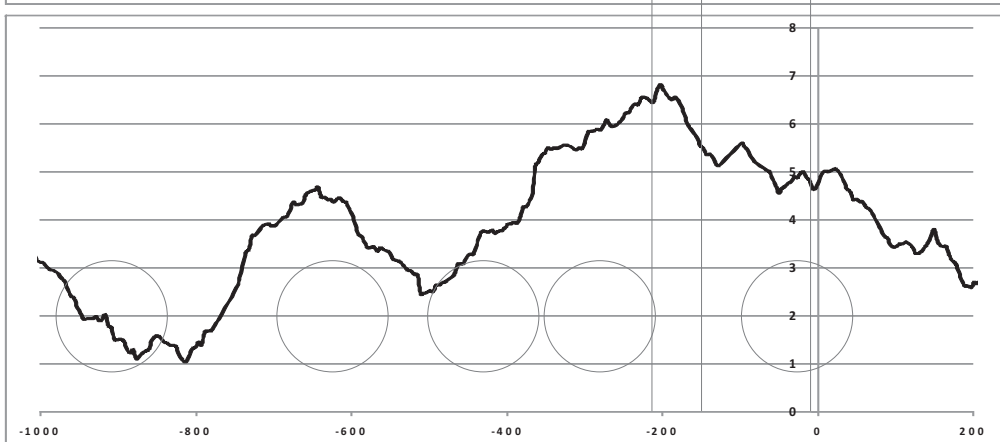

**B*****RIM9***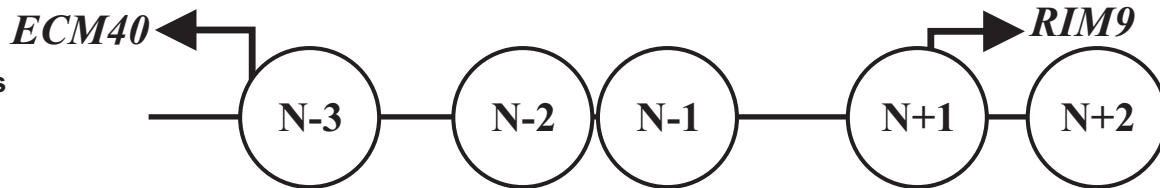

Nucleosome Positions  
according to  
Jiang and Pugh

Badis *et al.* Rsc3 sites

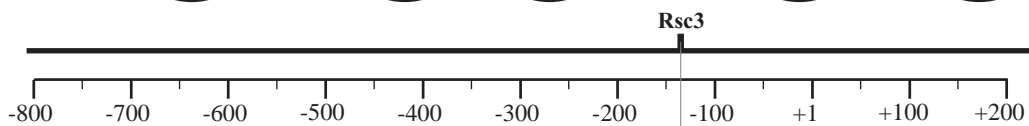

Badis *et al.*  
*rsc3-ts* / WT

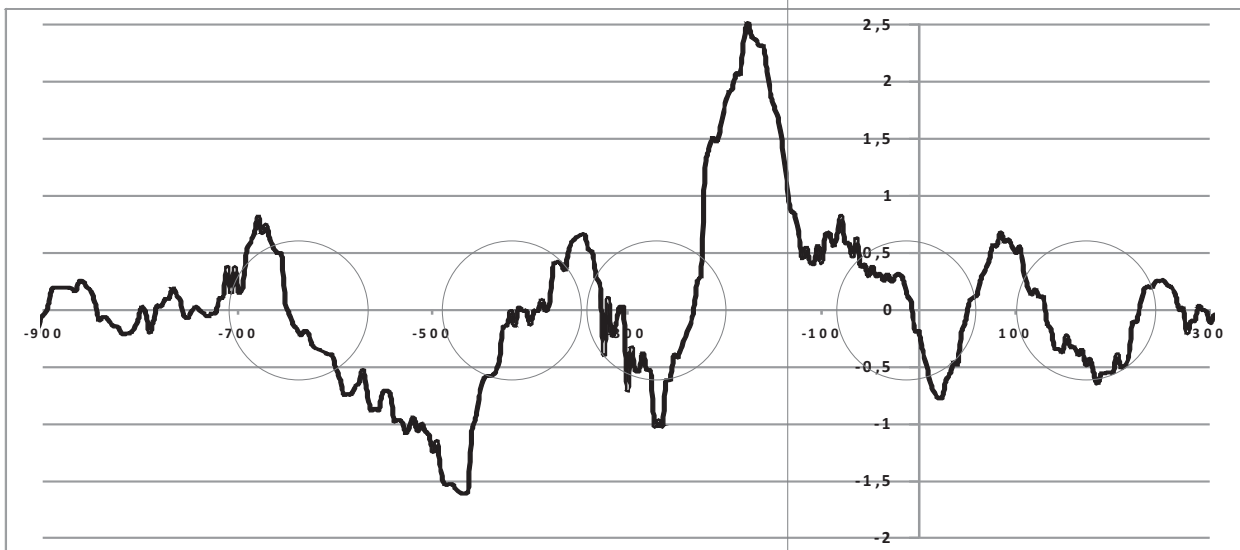

$\log_2(\text{rsc3-ts/WT ratio})$

Venters *et al.*  
Rsc9  
enrichment

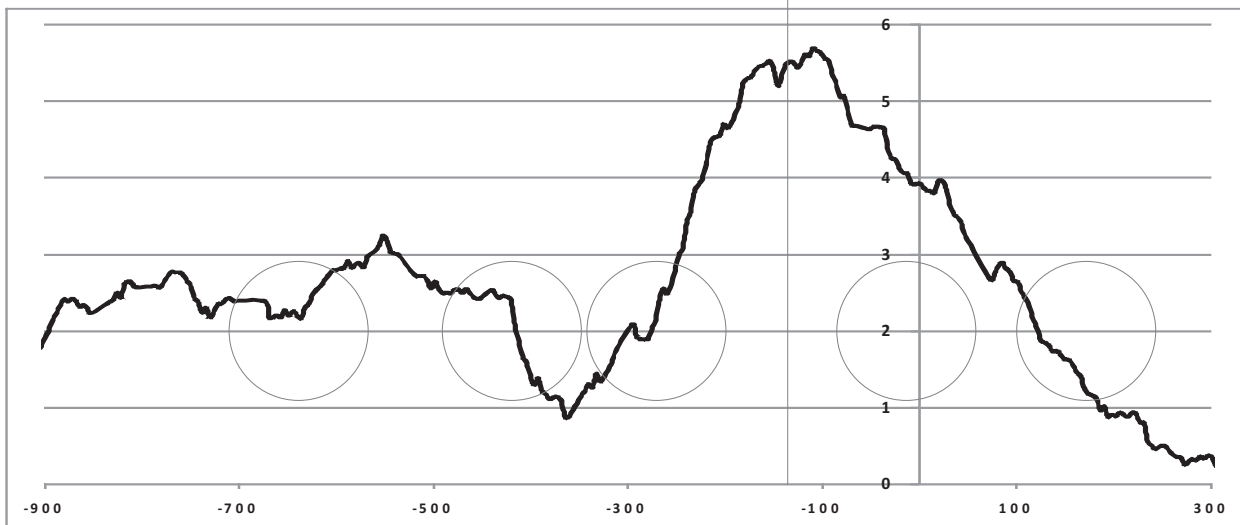

relative enrichment

**C****CHA1**Nucleosome Positions  
according to  
Jiang and Pugh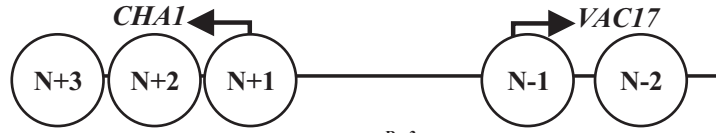Badis *et al.* Rsc3 sites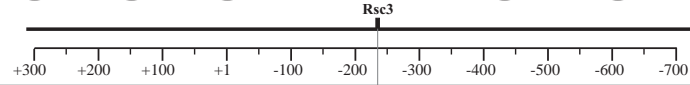Badis *et al.*  
*rsc3-ts* / WT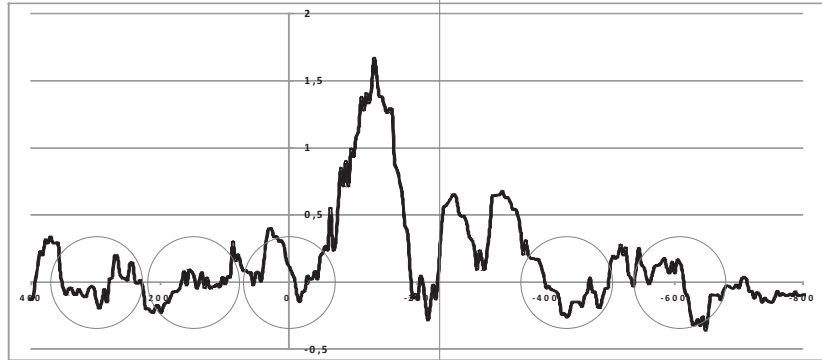log<sub>2</sub>(*rsc3-ts*/WT ratio)Parnell *et al.*  
nucleosome  
occupancy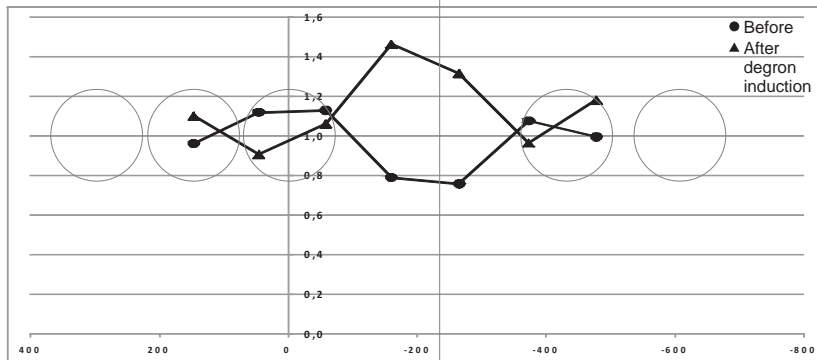

ratio degren/control

Hartley *et al.*  
Nucleosome  
Occupancy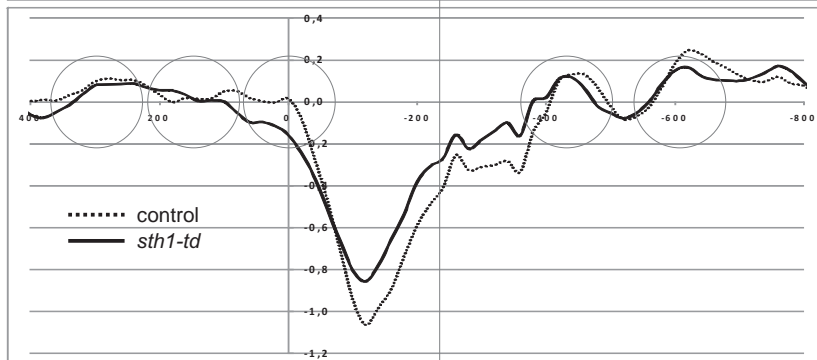log<sub>2</sub> nucleosomal DNA enrichmentParnell *et al.*  
Rsc3/Rsc8  
enrichment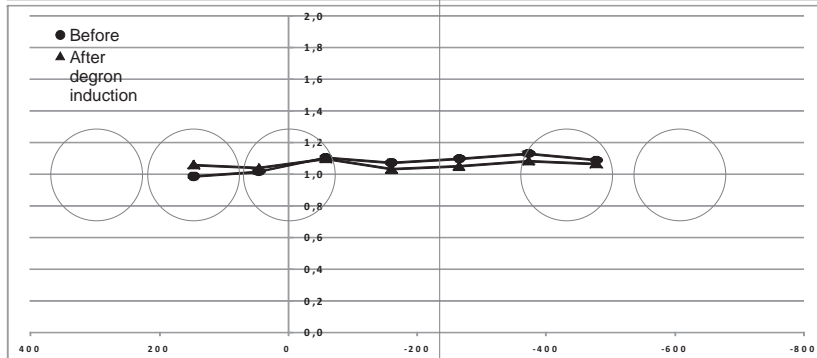

ratio degren/control

Venters *et al.*  
Rsc9  
enrichment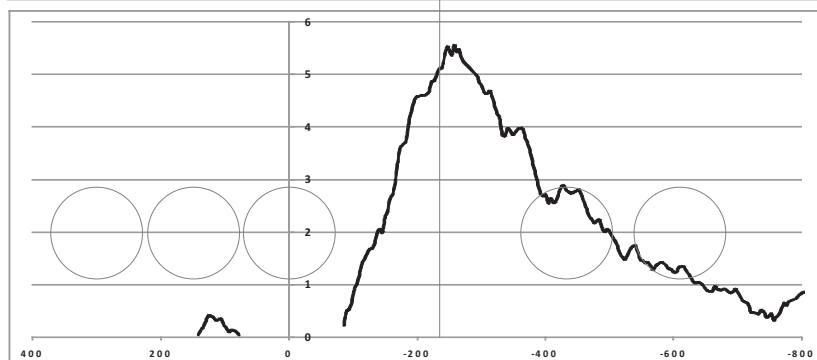

relative enrichment

**D*****SNT1***Nucleosome Positions  
according to  
Jiang and Pugh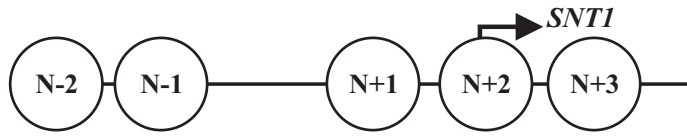Badis *et al.* Rsc3 sites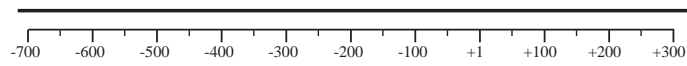Badis *et al.*  
*rsc3-ts* / WT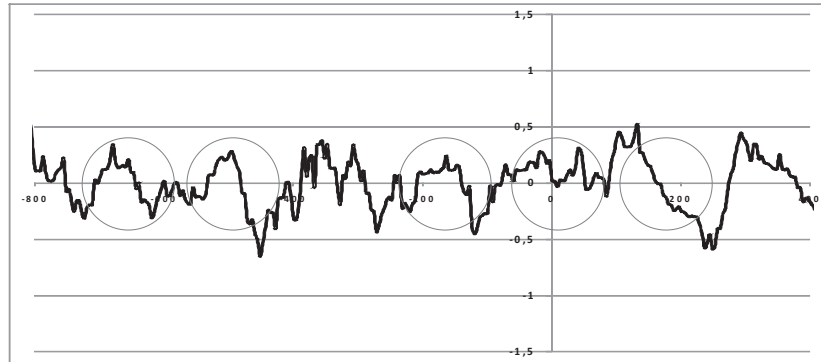 $\log_2(\text{rsc3-ts/WT ratio})$ Hartley *et al.*  
Nucleosome  
Occupancy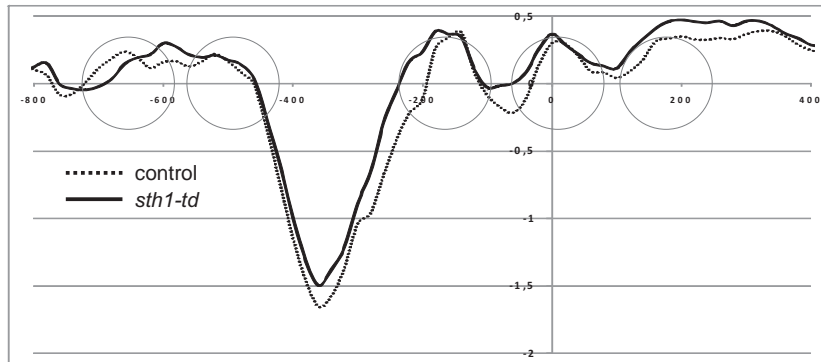 $\log_2$  nucleosomal DNA enrichmentVenters *et al.*  
Rsc9  
enrichment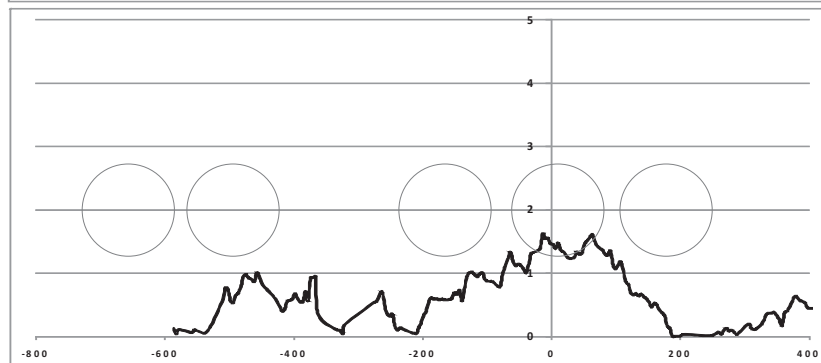

relative enrichment

Hartley *et al.*  
Nucleosome  
Occupancy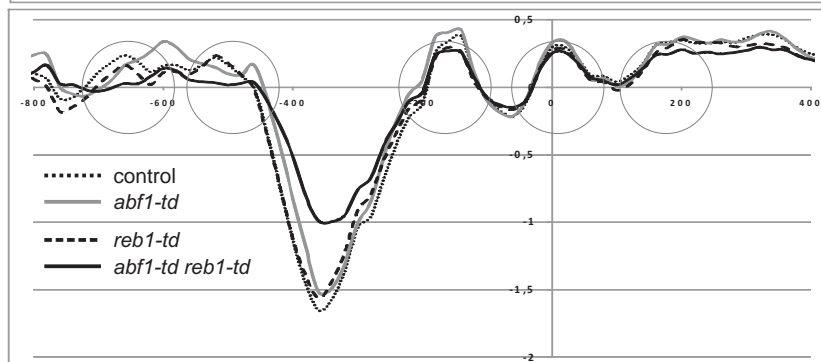 $\log_2$  nucleosomal DNA enrichmentVenters *et al.*  
Reb1 and Swr1  
enrichment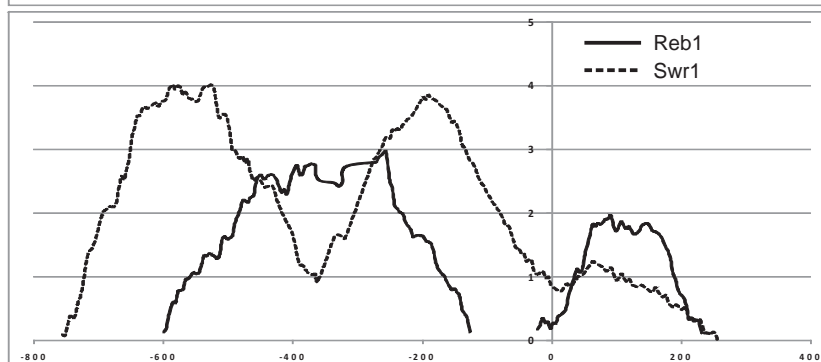

relative enrichment



**E*****GAL10***

Nucleosome Positions  
according to  
Jiang and Pugh

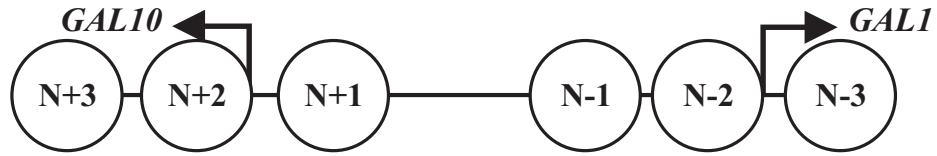

Badis *et al.* Rsc3 sites

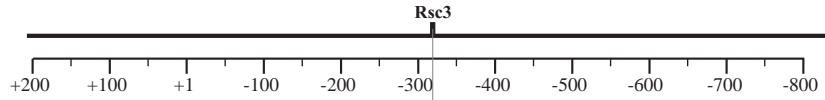

Badis *et al.*  
*rsc3-ts* / WT

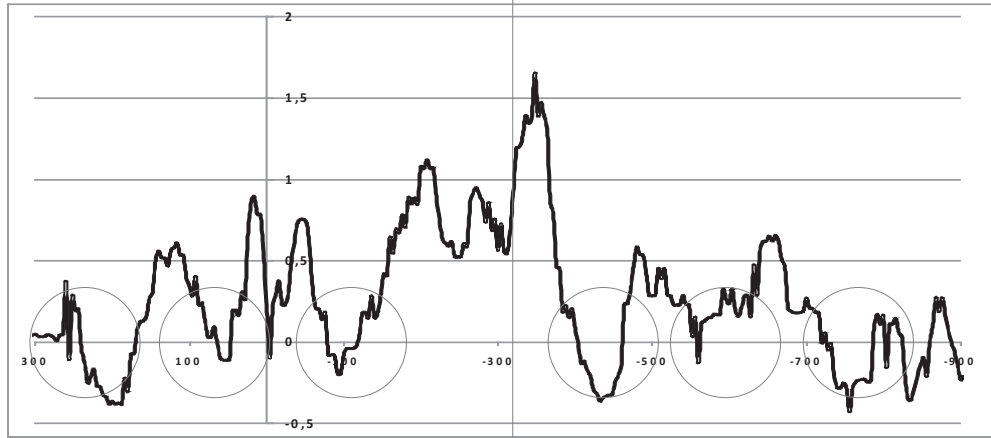

Parnell *et al.*  
nucleosome  
occupancy

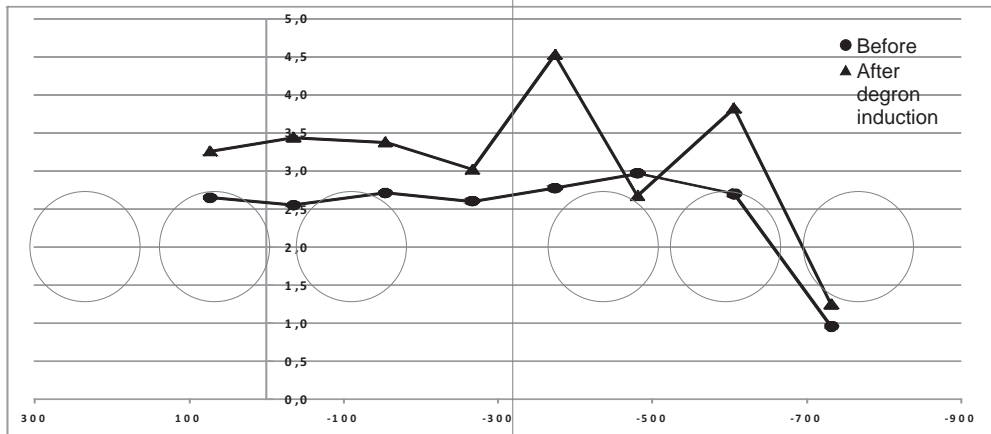

Parnell *et al.*  
Rsc3/Rsc8  
enrichment

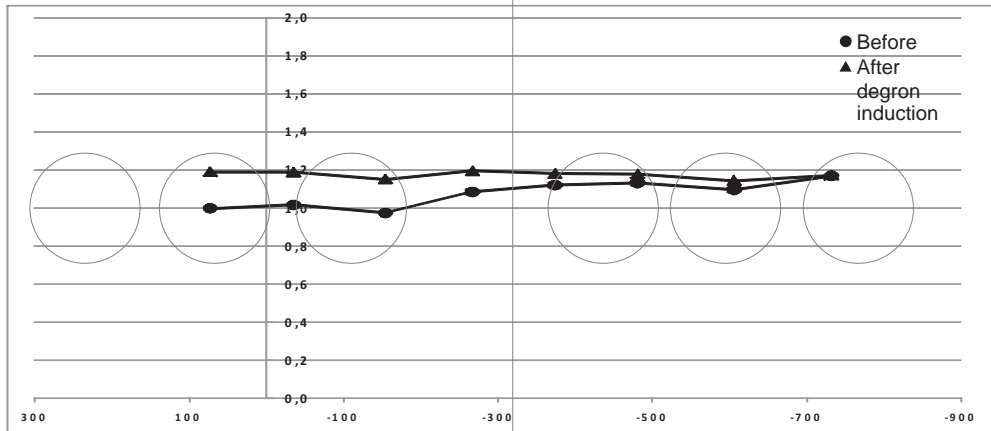

Venters *et al.*  
Rsc9  
enrichment

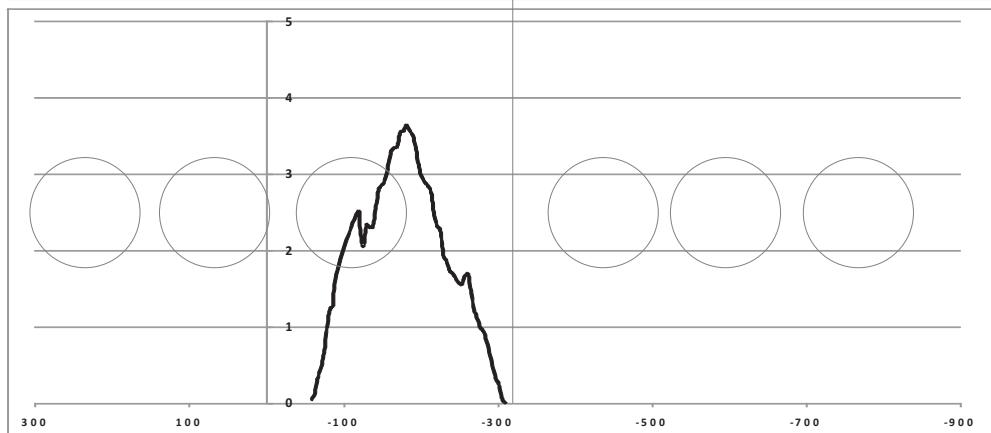

$\log_2(\text{rsc3-ts/WT ratio})$

ratio degon/control

ratio degon/control

relative enrichment

**F*****RIO1***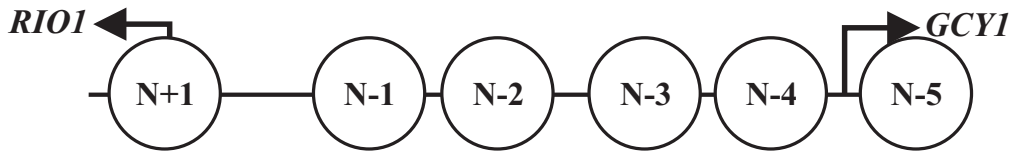

Nucleosome Positions  
according to  
Jiang and Pugh

Badis *et al.* Rsc3 sites

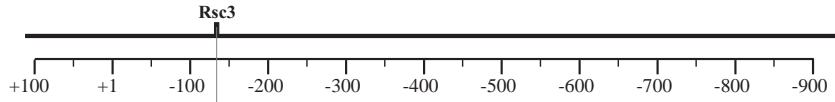

Badis *et al.*  
*rsc3-ts* / WT

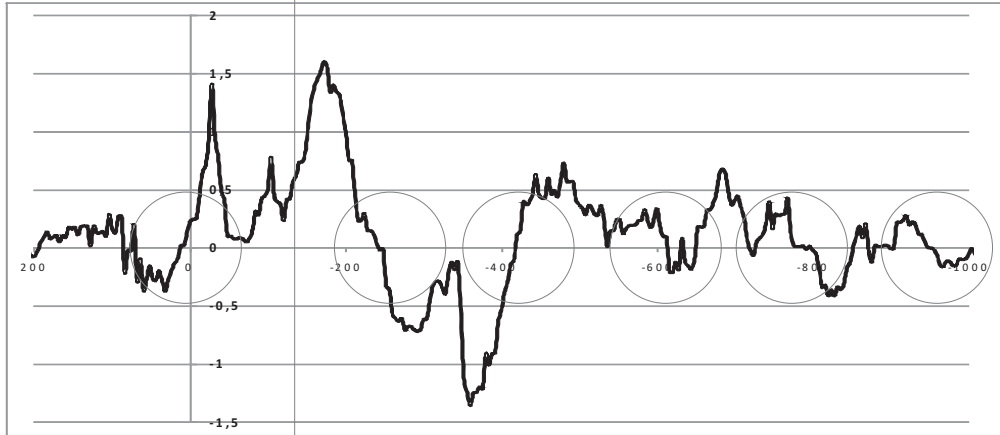

log<sub>2</sub>(*rsc3-ts*/WT ratio)

Parnell *et al.*  
nucleosome  
occupancy

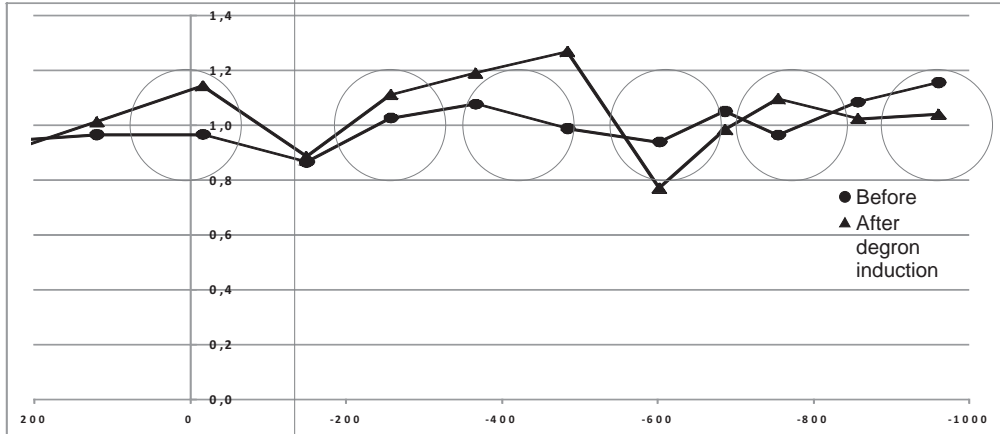

ratio degron/control

Parnell *et al.*  
Rsc3/Rsc8  
enrichment

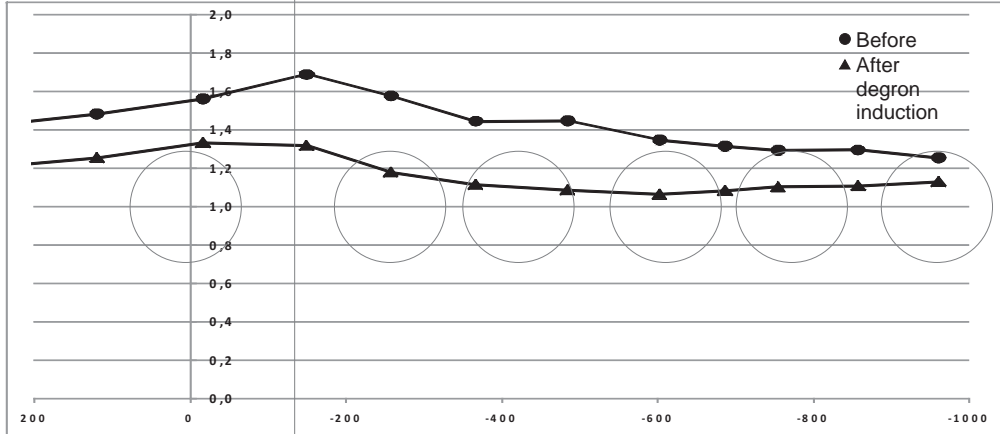

ratio degron/control

Venters *et al.*  
Rsc9  
enrichment

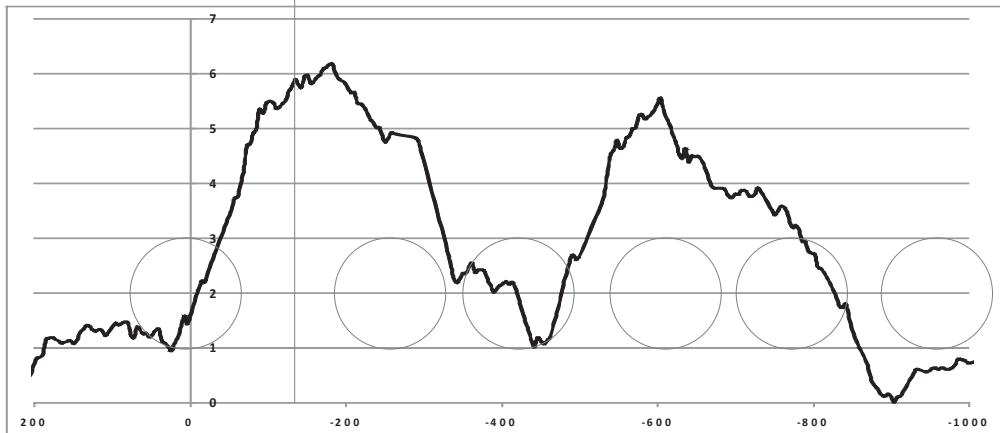

relative enrichment

# G

## ADH2

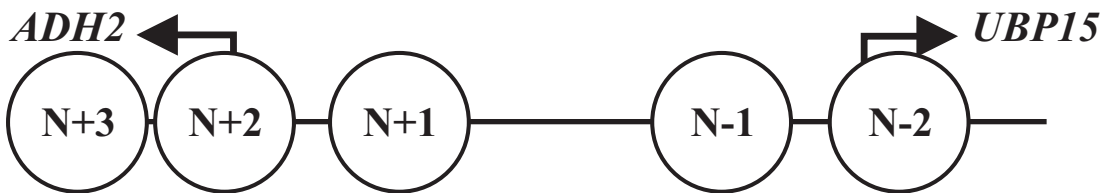

Nucleosome Positions according to Jiang and Pugh

Badis *et al.* Rsc3 sites

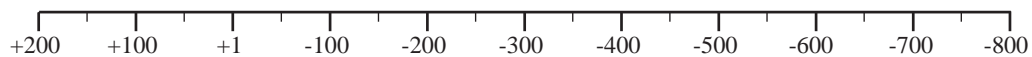

Badis *et al.* *rsc3-ts* / WT

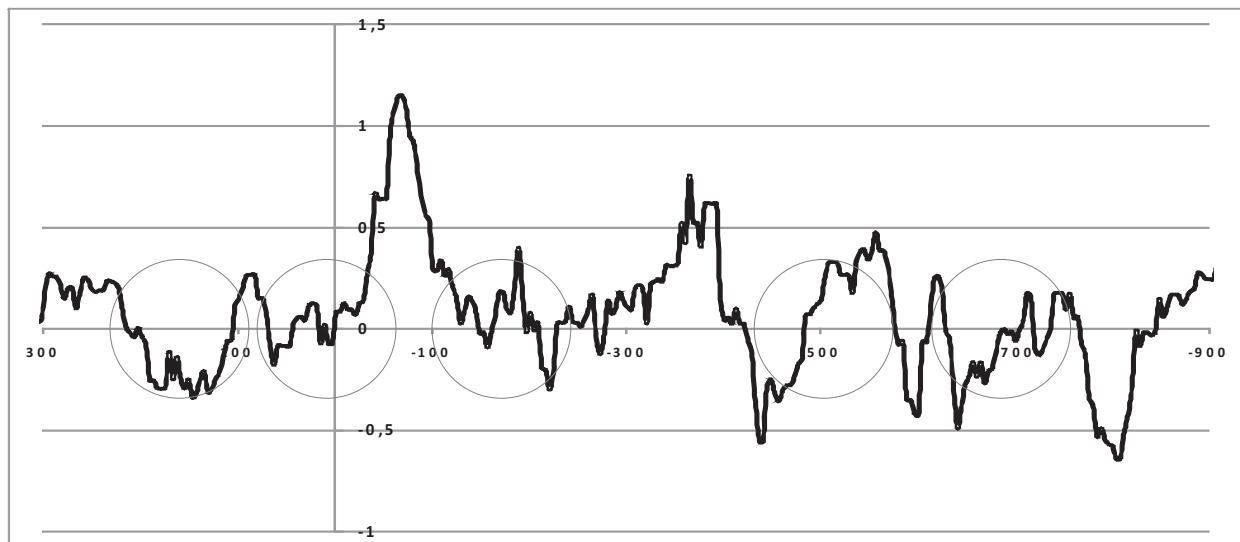

Venters *et al.* Rsc9 enrichment

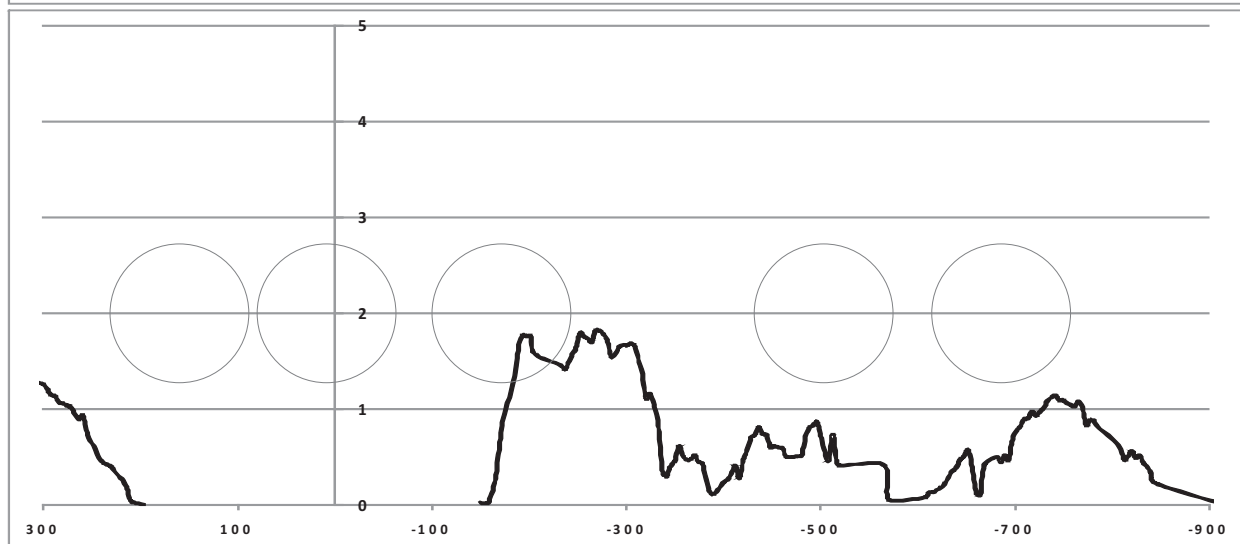

# H

**RNR3**

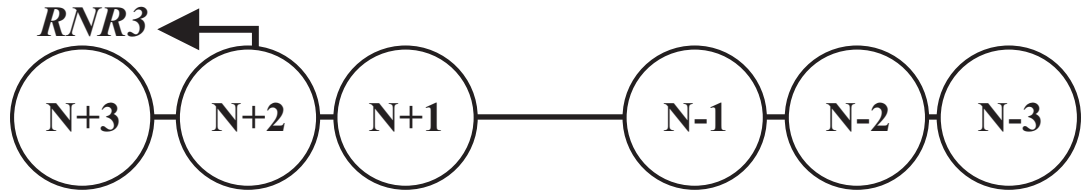

Nucleosome Positions according to Jiang and Pugh

Badis *et al.* Rsc3 sites

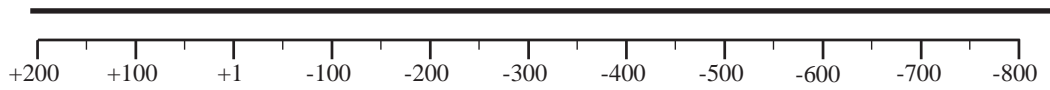

Badis *et al.* *rsc3-ts* / WT

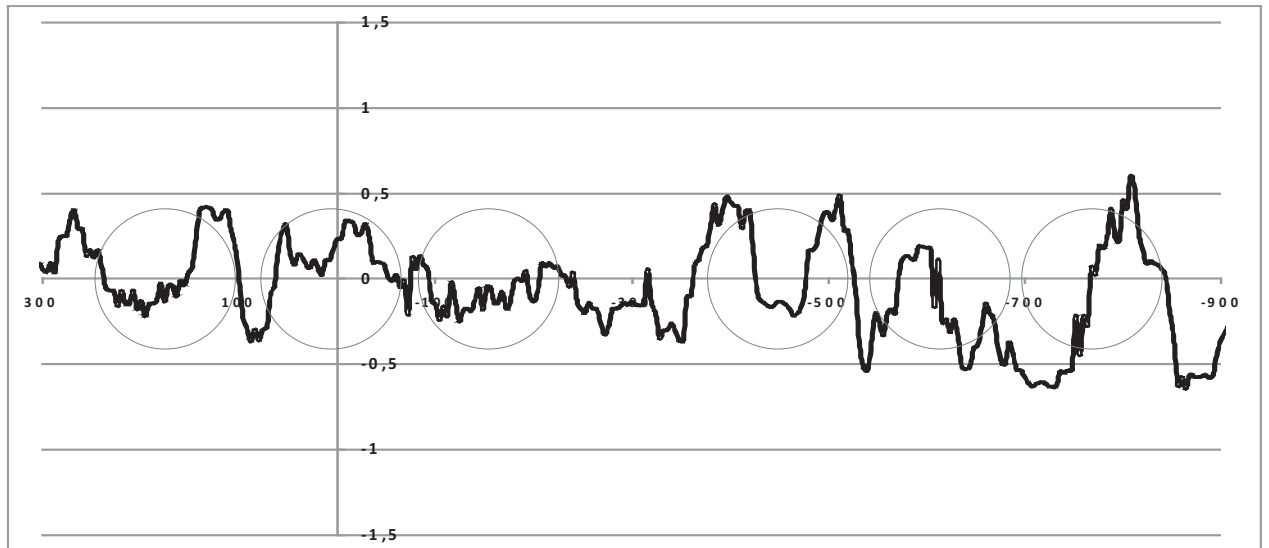

$\log_2(\text{rsc3-ts/WT ratio})$

Venters *et al.* Rsc9 enrichment

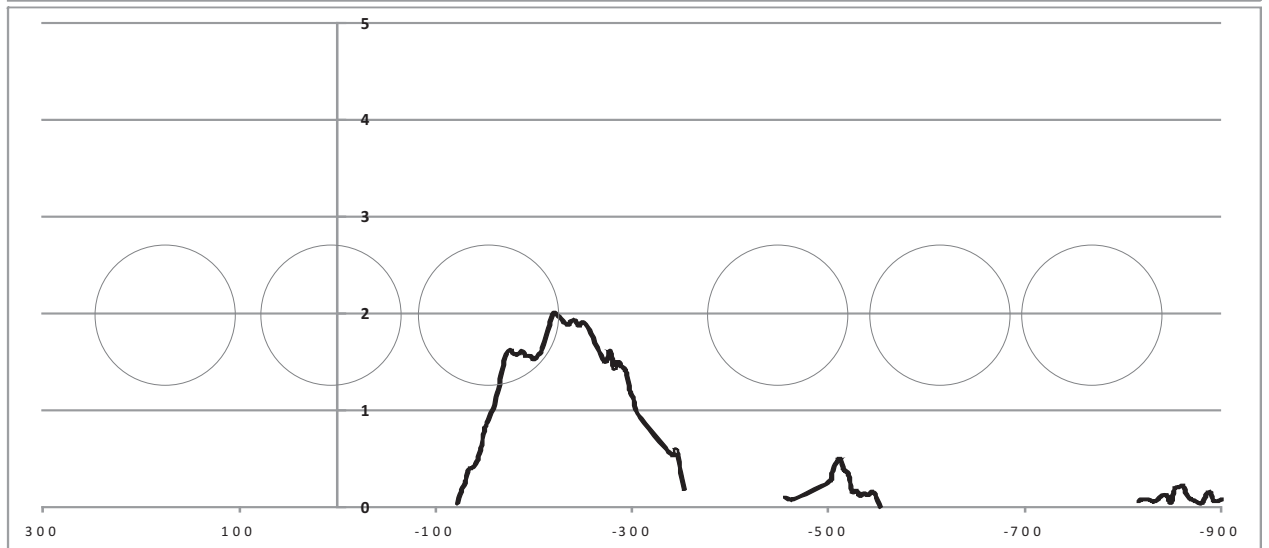

relative enrichment

# PHO5

Nucleosome Positions according to Almer *et al.*

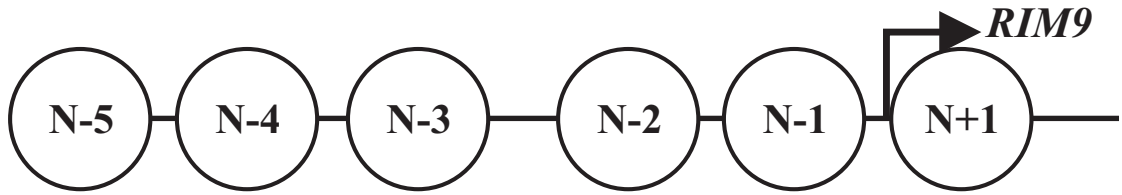

Badis *et al.* Rsc3 sites

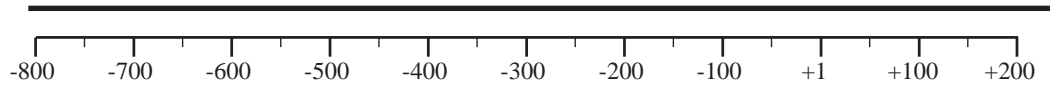

Badis *et al.*  
*rsc3-ts* / WT

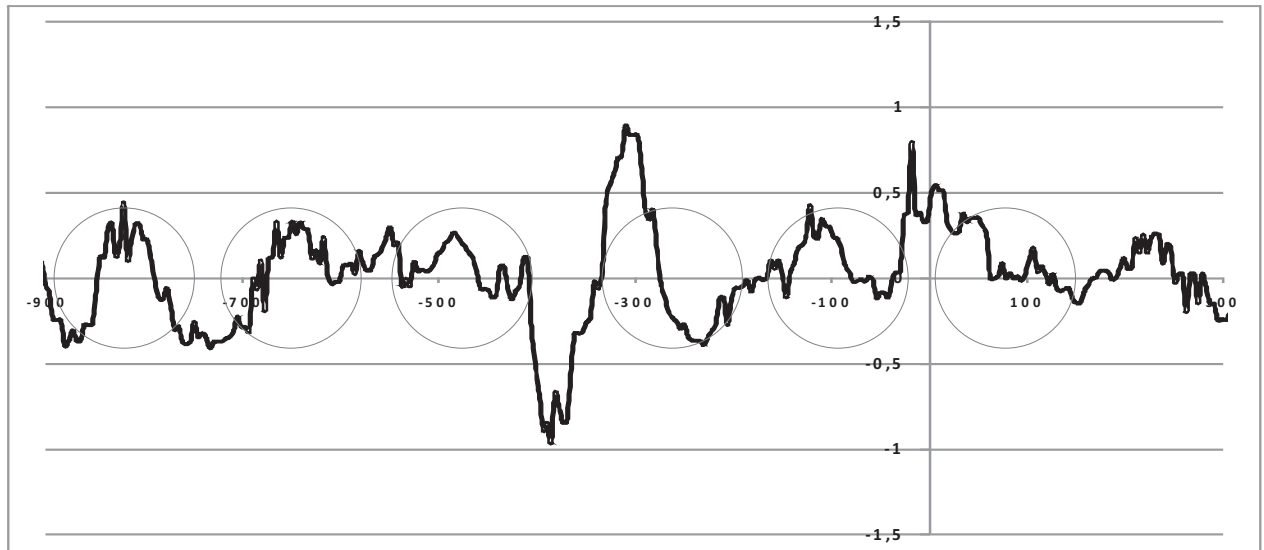

$\log_2(\text{rsc3-ts/WT ratio})$

Venters *et al.*  
Rsc9  
enrichment

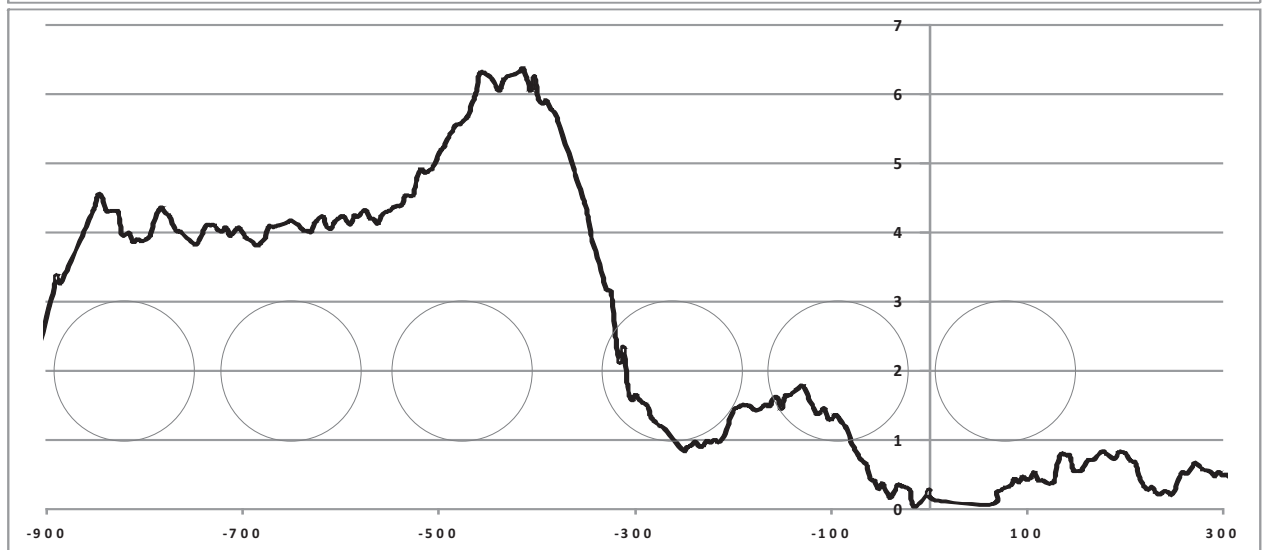

relative enrichment

J

# PHO84

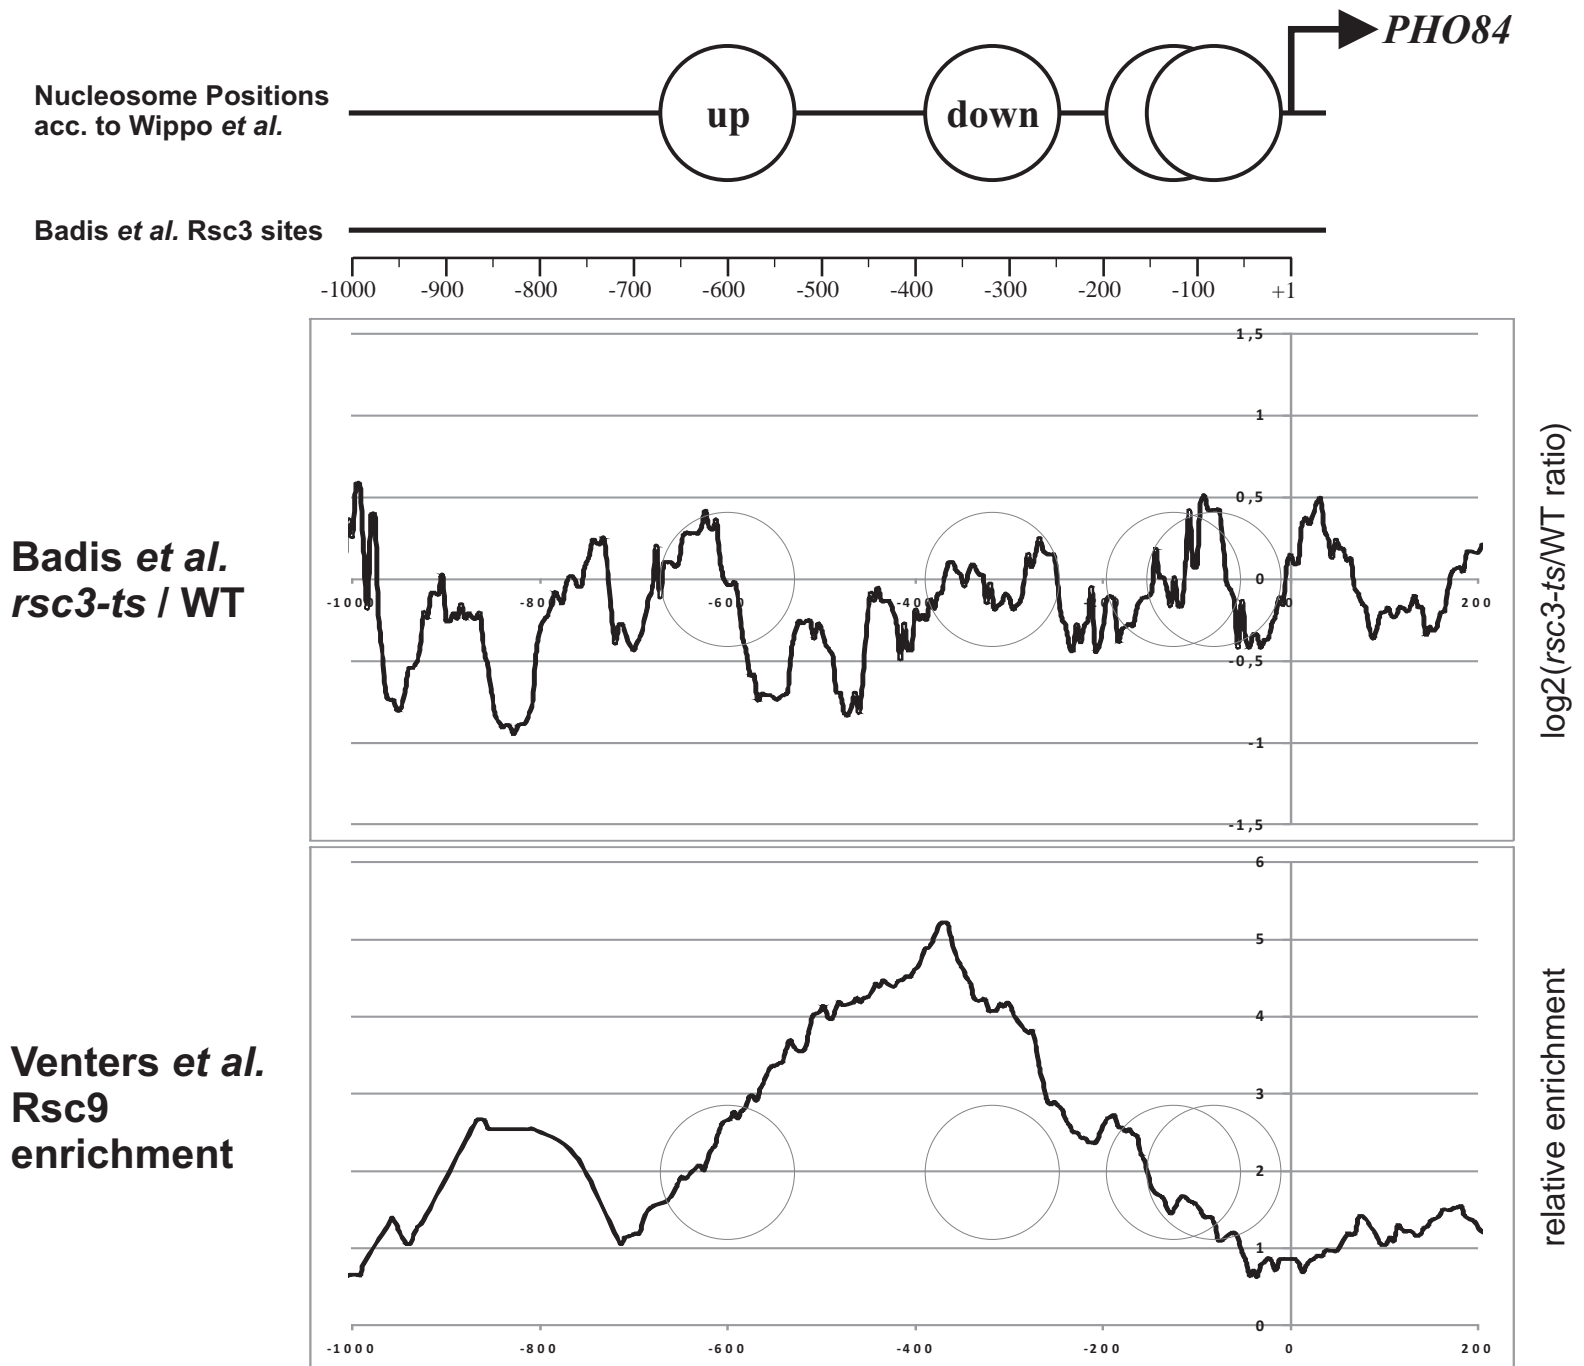

**Supplementary Figure S4** Comparison of the available datasets on RSC localization and effects on nucleosome occupancy upon ablation of RSC subunits. (A-J) The Schematics at the top indicate the position of the nucleosomes (according to Jiang and Pugh (2009) unless stated otherwise) and the ORF starts (broken arrows). Putative Rsc3 binding sites as identified using the Badis *et al.* (2008) PWM are shown in the panel below. The graphs below the schematics show nucleosome occupancy changes in a *rsc3-ts* strain (Badis *et al.* (2008)) and *sth1-td* strains (Parnell *et al.* (2008) and Hartley and Madhani (2009)) as well as RSC occupancy profiles obtained by Parnell *et al.* (2008) and Venters *et al.* (2009) as indicated. For some loci only limited amounts of data were available, since the microarray of Parnell *et al.* only included selected promoters and the microarray of Hartley *et al.* was limited to chromosome III. Gaps in the Venters *et al.* Rsc9 profile correspond to unavailable data for the corresponding regions.

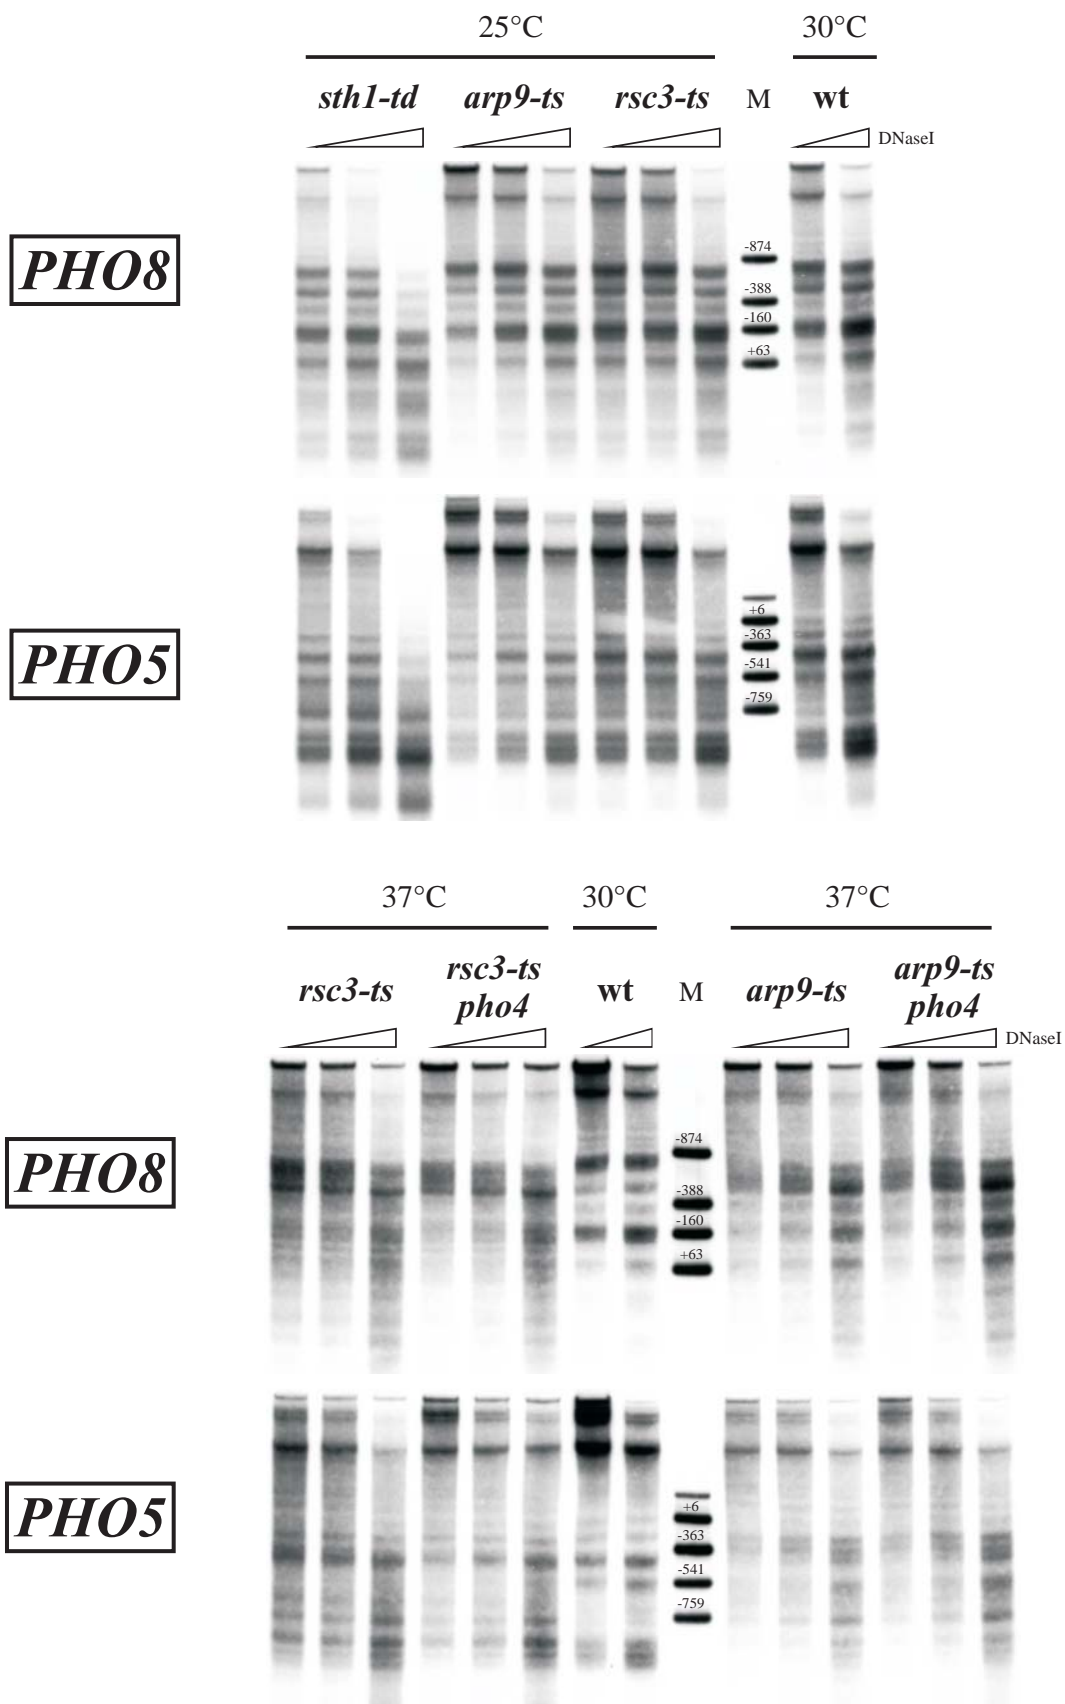

**Supplementary Figure S5** Changes in *PHO8* promoter chromatin upon loss of Rsc3 or Arp9 were Pho4-independent and only seen at the non-permissive temperature. As Figure 5, but for the indicated loci, strains and growth conditions, i.e., either logarithmic growth at 25 °C or 30 °C or logarithmic growth at 25 °C and then shifted to 37 °C overnight.

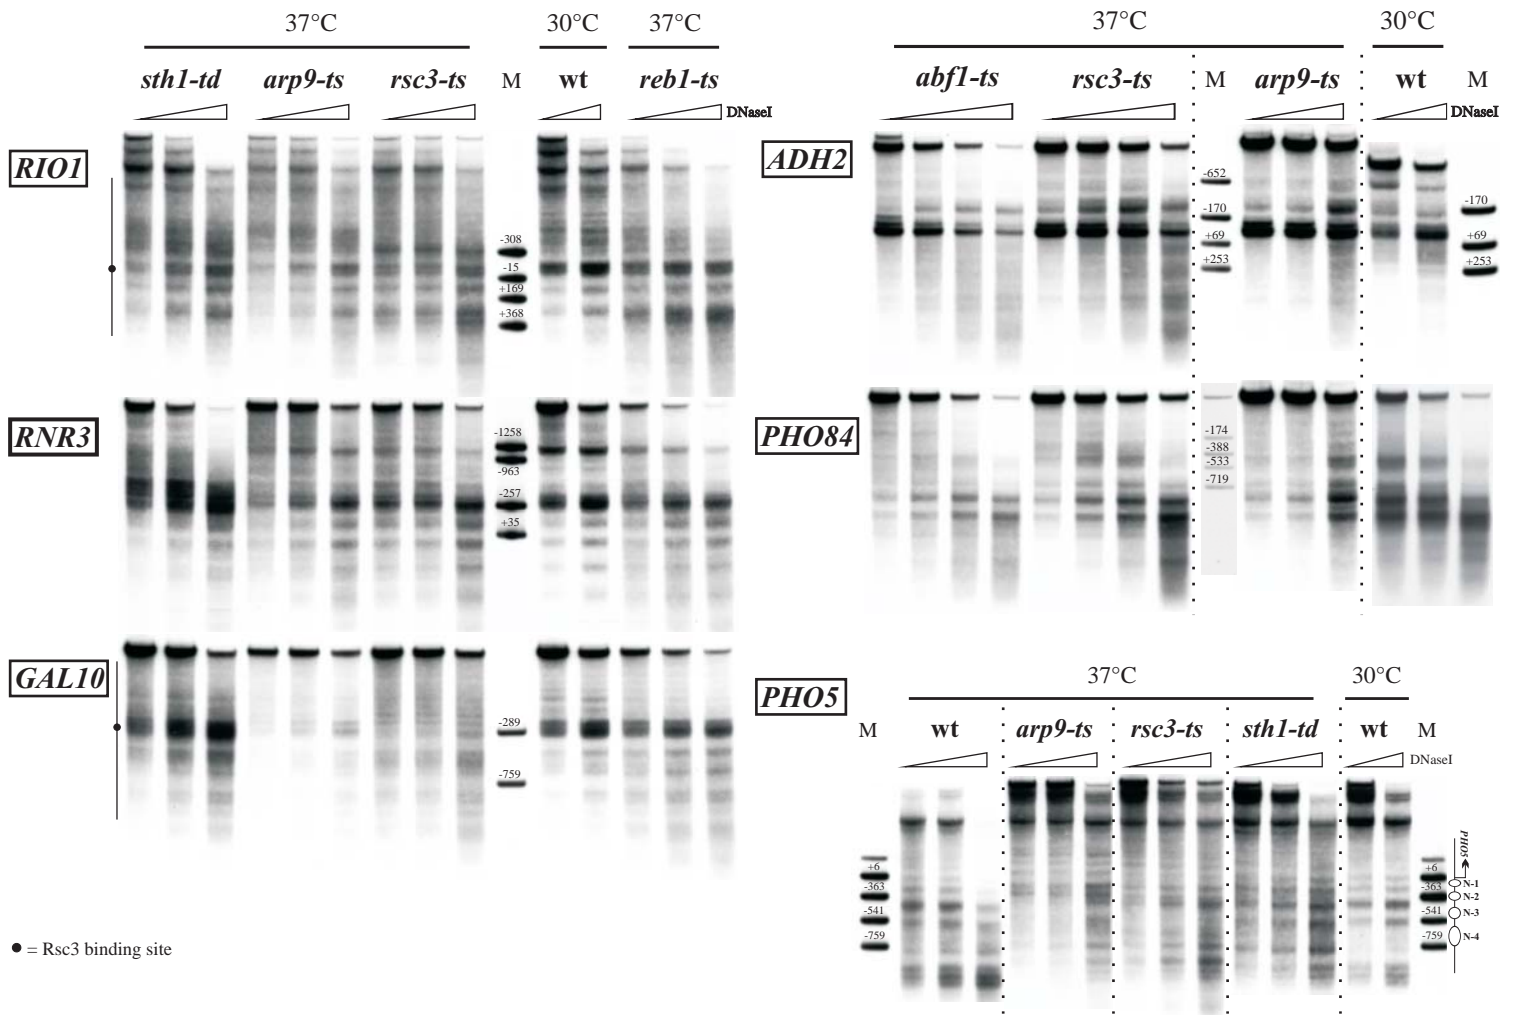

**Supplementary Figure S6** Changes of the chromatin structure upon RSC inactivation at the *R1O1*, *RNR3*, *GAL10*, *ADH2*, *PHO84*, and *PHO5* promoters. As Figure 5, but for the indicated loci. Strains with temperature sensitive alleles of the genes encoding Reb1 or Abf1 (TH8242 and TH8246, respectively) grown under restrictive conditions are included for some loci. As there were no effects in these strains, they serve as negative control for the growth conditions.



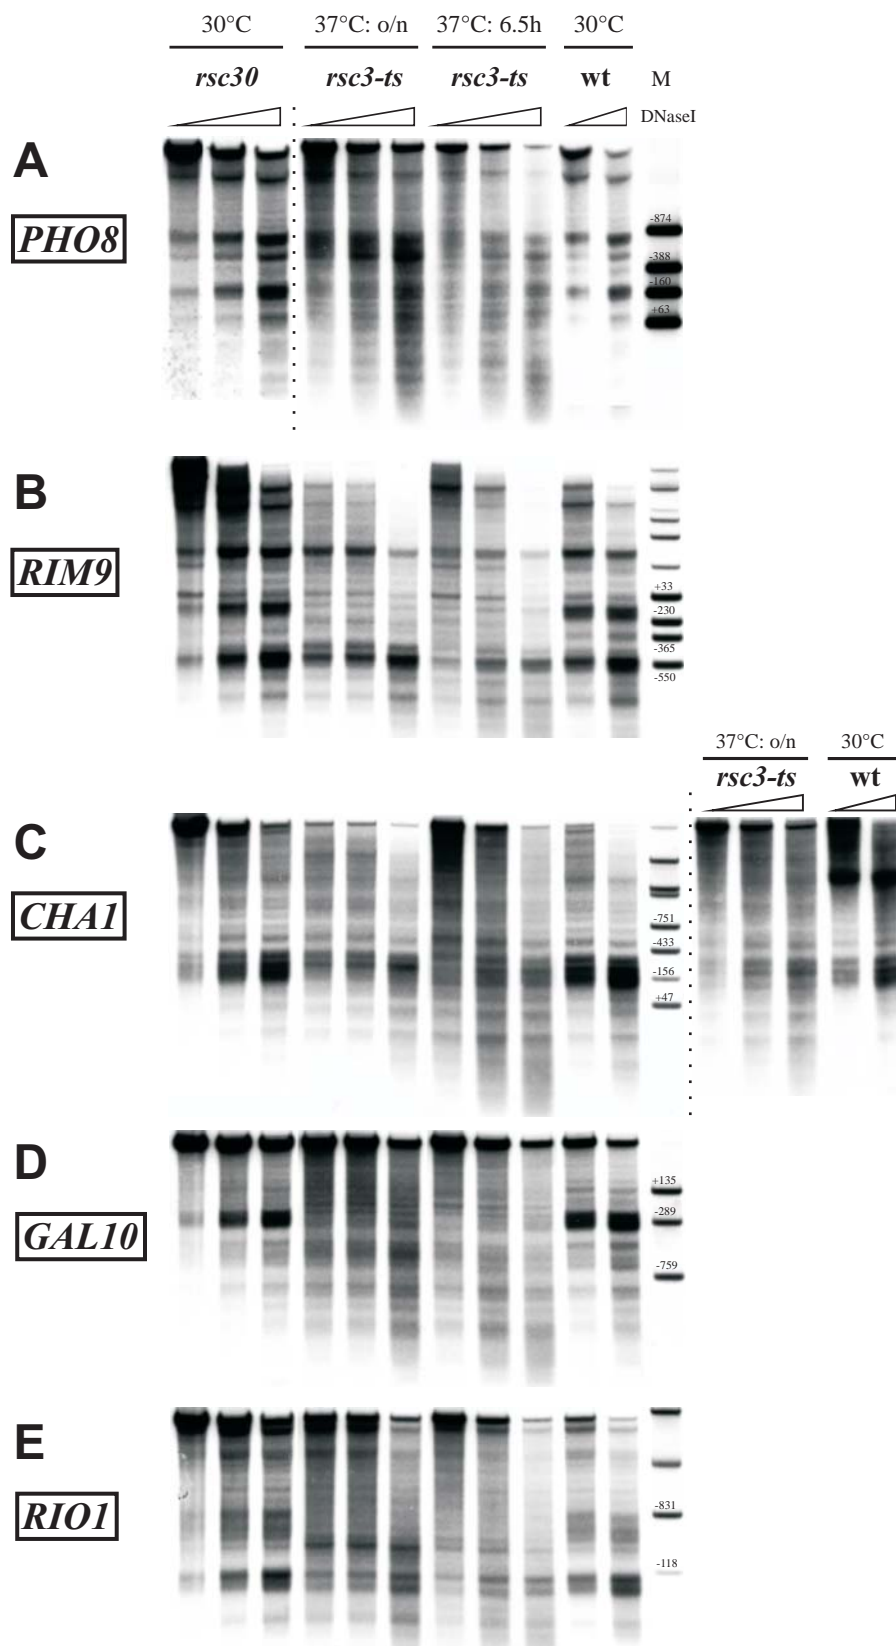

**Supplementary Figure S7** Also shorter incubation times at the restrictive temperature showed the altered chromatin structures at the *PHO8*, *RIM9*, *CHA1*, *GAL10* and *RIO1* promoters in the *rsc3-ts* strain. DNaseI indirect end labeling analysis of the (A) *PHO8*, (B) *RIM9*, (C) *CHA1* (D) *GAL10* and (E) *RIO1* promoter regions *in vivo*. Nuclei were isolated from a wildtype strain (wt; BY4741), a strain carrying the deletion mutant allele *rsc30* (YBC693) and the *rsc3-ts* (TH8247) mutant. Strains were grown either grown logarithmically at 30°C, or at 25 °C and then shifted to the non-permissive temperature (37 °C) for 6.5h as done by Badis et al. (2008) or overnight. The results for the *CHA1* locus in lanes 4 to 6 and lanes 10 to 12 are the same as in Figure 5C. In addition, results of an experiment where there was not much difference between the wt and the *rsc3-ts* mutant after overnight incubation at 37 °C is shown on the right to the stippled line in panel (C). A stippled line separates samples that were not electrophoresed alongside on the same gel but combined in the figure. Ramps, markers and schematics as in Figure 4.

**A****PHO8**

|                       | <b>Rsc3 site at -10</b> | <b>Rsc3 site at -151</b> | <b>Rsc3 site at -214</b> |
|-----------------------|-------------------------|--------------------------|--------------------------|
| <i>S.cerevisiae</i>   | <b>C G C G C A T</b>    | <b>T C G C G C G T</b>   | <b>A G G C G C G</b>     |
| <i>S.paradoxus</i>    | <b>C G C G C A T</b>    | <b>T C G C G C G T</b>   | <b>A G G C G C G</b>     |
| <i>S.mikatae</i>      | <b>C G C G C A T</b>    | <b>T C G C G C G T</b>   | <b>A G G C G C G</b>     |
| <i>S.bayanus</i>      | T A A G C A T           | <b>T C G C G C G T</b>   | <b>A G G C G C G</b>     |
| <i>S.kudriavzevii</i> | C T A G C A T           | <b>T C G C G C G T</b>   | <b>A G G C G C G</b>     |
| <i>S.castelli</i>     | A G A G T A A           | G T A C A C A G          | C C A C T C G            |

**B**

|                       | <b>RIM9</b><br><b>Rsc3 site at -133</b> | <b>CHAI</b><br><b>Rsc3 site at -239</b> | <b>GAL10</b><br><b>Rsc3 site at -214</b> | <b>RIO1</b><br><b>Rsc3 site at -134</b> |
|-----------------------|-----------------------------------------|-----------------------------------------|------------------------------------------|-----------------------------------------|
| <i>S.cerevisiae</i>   | <b>C G G C G C G C G C A A</b>          | <b>C T G C G C G</b>                    | <b>C G G C G C G</b>                     | <b>T G G C G C G C G C A G</b>          |
| <i>S.paradoxus</i>    | <b>C G G C G C G C G C T A</b>          | T T T C G T G                           | <b>C G G C G C G</b>                     | <b>T A G C G C G C G C A G</b>          |
| <i>S.mikatae</i>      | <b>C G G C G C G C C T A A</b>          | <b>C T G C G C G</b>                    | T G G T G C G                            | <b>T A G C G C G C G C A A</b>          |
| <i>S.bayanus</i>      | <b>C G G C G C G C A A G A</b>          | C C G T G C G                           | <b>C G G C G C G</b>                     | <b>C A T C G C G C G A C G</b>          |
| <i>S.kudriavzevii</i> | <b>C G G C G C G C G C A A</b>          | <b>C C G C G C G</b>                    | - - - - -                                | <b>T A G C G C C C G A C G</b>          |
| <i>S.castelli</i>     | <b>T G G C G C G T A T G T</b>          | A G C G G T G                           | C T T C A T C                            | <b>A A G T C A G T A C A G</b>          |
| <i>S.kluyveri</i>     | <b>T C G C A T A A T T A A</b>          | G C T C T T T                           | - - - - -                                | - - - - -                               |

***SNT1, PHO5, ADH2, RNR3, PHO84*: no predicted Rsc3 binding site**

**Supplementary Figure S8** Evolutionary conservation of Rsc3 binding sites at various loci. (A) Sequence alignment of three predicted Rsc3 sites at the *PHO8* promoter in the indicated *Saccharomyces* species. CGCGC consensus motif in bold and cross-species conservation marked by black dots. (B) As (A), but for the indicated loci.

**Supplementary Table S1** Yeast strains used in this study.

| Strain          | Genotype                                          | Reference                                                                                                                               |
|-----------------|---------------------------------------------------|-----------------------------------------------------------------------------------------------------------------------------------------|
| Y00000 (BY4741) | MATa his3Δ1 leu2Δ0 met15Δ0 ura3Δ0                 | <p>EUROSCARF<br/> <a href="http://web.uni-frankfurt.de/fb15/mikro/euroscarf/">http://web.uni-frankfurt.de/fb15/mikro/euroscarf/</a></p> |
| Y00397          | MATa his3Δ1 leu2Δ0 met15Δ0 ura3Δ0 scw3::kanMX4    |                                                                                                                                         |
| Y00994          | MATa his3Δ1 leu2Δ0 met15Δ0 ura3Δ0 rrm3::kanMX4    |                                                                                                                                         |
| Y01076          | MATa his3Δ1 leu2Δ0 met15Δ0 ura3Δ0 ypl216w::kanMX4 |                                                                                                                                         |
| Y01285          | MATa his3Δ1 leu2Δ0 met15Δ0 ura3Δ0 rpb4::kanMX4    |                                                                                                                                         |
| Y01343          | MATa his3Δ1 leu2Δ0 met15Δ0 ura3Δ0 scp160::kanMX4  |                                                                                                                                         |
| Y01514          | MATa his3Δ1 leu2Δ0 met15Δ0 ura3Δ0 hsp104::kanMX4  |                                                                                                                                         |
| Y01655          | MATa his3Δ1 leu2Δ0 met15Δ0 ura3Δ0 hap5::kanMX4    |                                                                                                                                         |
| Y02123          | MATa his3Δ1 leu2Δ0 met15Δ0 ura3Δ0 taf14::kanMX4   |                                                                                                                                         |
| Y03092          | MATa his3Δ1 leu2Δ0 met15Δ0 ura3Δ0 sef1::kanMX4    |                                                                                                                                         |
| Y03418          | MATa his3Δ1 leu2Δ0 met15Δ0 ura3Δ0 sgf29::kanMX4   |                                                                                                                                         |
| Y03648          | MATa his3Δ1 leu2Δ0 met15Δ0 ura3Δ0 rtt103::kanMX4  |                                                                                                                                         |
| Y04196          | MATa his3Δ1 leu2Δ0 met15Δ0 ura3Δ0 eaf1::kanMX4    |                                                                                                                                         |
| Y05326          | MATa his3Δ1 leu2Δ0 met15Δ0 ura3Δ0 cdc73::kanMX4   |                                                                                                                                         |
| Y05347          | MATa his3Δ1 leu2Δ0 met15Δ0 ura3Δ0 hda1::kanMX4    |                                                                                                                                         |
| Y05727          | MATa his3Δ1 leu2Δ0 met15Δ0 ura3Δ0 paf1::kanMX4    |                                                                                                                                         |
| Y05922          | MATa his3Δ1 leu2Δ0 met15Δ0 ura3Δ0 yta7::kanMX4    |                                                                                                                                         |
| Y05927          | MATa his3Δ1 leu2Δ0 met15Δ0 ura3Δ0 rtt102::kanMX4  |                                                                                                                                         |
| Y06520          | MATa his3Δ1 leu2Δ0 met15Δ0 ura3Δ0 yml199w::kanMX4 |                                                                                                                                         |
| Y06546          | MATa his3Δ1 leu2Δ0 met15Δ0 ura3Δ0 yku80::kanMX4   |                                                                                                                                         |
| Y06566          | MATa his3Δ1 leu2Δ0 met15Δ0 ura3Δ0 sto1::kanMX4    |                                                                                                                                         |

**Supplementary Table S1 - continued**

| <b>Strain</b>                  | <b>Genotype</b>                                                                                           | <b>Reference</b>       |
|--------------------------------|-----------------------------------------------------------------------------------------------------------|------------------------|
| TH8242                         | MATa his3Δ1 leu2Δ0 met15Δ0 ura3Δ0 abf1-101::KanMX                                                         | Badis et al. 2008      |
| TH8245                         | MATa his3Δ1 leu2Δ0 met15Δ0 ura3Δ0 rap1-1::KanMX                                                           |                        |
| TH8246                         | MATa his3Δ1 leu2Δ0 met15Δ0 ura3Δ0 KanMX::reb1-212-URA3                                                    |                        |
| TH8247<br>(= <i>rsc3-ts</i> )  | MATa his3Δ1 leu2Δ0 met15Δ0 ura3Δ0 rsc3-1::KanMX                                                           |                        |
| TH8239                         | MATa his3Δ1 leu2Δ0 met15Δ0 ura3Δ0 rsc3-1::kanMX rsc8-TAP::HIS3MX6                                         |                        |
| YBC693                         | MATa ade2Δ::hisG his3Δ200 leu2Δ0 lys2Δ0 met15Δ0 trp1Δ63 ura3Δ0 rsc30Δ::LEU2                               | Angus-Hill et al. 2001 |
| YBC1536<br>(= <i>arp9-ts</i> ) | MATa lys2-128δ leu2Δ1 ura3-52 trp1Δ63 his3Δ200 arp9Δ::LEU2 [p1014; arp9 G337F G338L; CEN TRP1]            | Szerlong et al. 2003   |
| YBC2191<br>(= <i>sth1-td</i> ) | MATa ura3-52 trp1Δ63 his3Δ200 leu2::PET56 ubr1Δ::pGAL1-UBR::HIS3 sth1Δ::pCUP1-sth1 <sup>td</sup> ::URA3   | Parnell et al. 2008    |
| YBC2192                        | MATa ura3-52 trp1Δ63 his3Δ200 leu2::PET56 ubr1Δ::HIS3 sth1Δ::pCUP1-sth1 <sup>td</sup> ::URA3              |                        |
| <i>arp9-ts pho4</i>            | MATa lys2-128δ leu2Δ1 ura3-52 trp1Δ63 his3Δ200 arp9Δ::LEU2 pho4Δ::URA3 [p1014;arp9 G337F G338L; CEN TRP1] | This work              |
| <i>rsc3-ts pho4</i>            | MATa his3Δ1 leu2Δ0 met15Δ0 ura3Δ0 rsc3-1::KanMX pho4Δ::URA3                                               | This work              |
| FY2810                         | MATa leu2Δ1 his4-912δ lys2-128δ FLAG-spt6-1004                                                            | F.Winston              |

|                              | Subunit(s) tested     | <i>PHO8</i>                                                                          | <i>RIM9</i> | <i>CHA1</i> | <i>SNT1</i> | <i>GAL10</i> | <i>RIO1</i> | <i>ADH2</i> | <i>RNR3</i> | <i>PHO5</i> | <i>PHO84</i> |
|------------------------------|-----------------------|--------------------------------------------------------------------------------------|-------------|-------------|-------------|--------------|-------------|-------------|-------------|-------------|--------------|
|                              |                       | <b>Changes in nucleosome occupancy/positioning upon inactivation of RSC subunits</b> |             |             |             |              |             |             |             |             |              |
| <b>Wippo <i>et al.</i></b>   | <b>Sth1/Rsc3/Arp9</b> | + + +                                                                                | + + +       | - (+) (-)   | - - -       | - + (-)      | (-) + (+)   | n.d. - -    | + - -       | - (+) +     | n.d. - -     |
| <b>Badis <i>et al.</i></b>   | <b>Rsc3</b>           | +                                                                                    | +           | +           | -           | +            | +           | (+)         | -           | (+)         | -            |
| <b>Parnell <i>et al.</i></b> | <b>Sth1</b>           | -                                                                                    | n.d.        | +           | n.d.        | +            | (-)         | n.d.        | n.d.        | n.d.        | n.d.         |
| <b>Hartley and Madhani</b>   | <b>Sth1</b>           | n.d.                                                                                 | n.d.        | (+)         | -           | n.d.         | n.d.        | n.d.        | n.d.        | n.d.        | n.d.         |
|                              |                       | <b>RSC-bound nucleosomes at the promoter</b>                                         |             |             |             |              |             |             |             |             |              |
| <b>Floer <i>et al.</i></b>   | <b>Rsc8</b>           | +                                                                                    | -           | -           | -           | +            | -           | -           | -           | -           | -            |
|                              |                       | <b>RSC occupancy</b>                                                                 |             |             |             |              |             |             |             |             |              |
| <b>Parnell <i>et al.</i></b> | <b>Rsc3/Rsc8</b>      | +                                                                                    | n.d.        | -           | n.d.        | -            | +           | n.d.        | n.d.        | n.d.        | n.d.         |
| <b>Venters <i>et al.</i></b> | <b>Rsc9</b>           | +                                                                                    | +           | +           | -           | +            | +           | -           | -           | +           | +            |
| <b>Ng <i>et al.</i></b>      | <b>Rsc1/2/8, Sth1</b> | +                                                                                    | +           | -           | -           | -            | +           | -           | -           | -           | -            |
| <b>Damelin <i>et al.</i></b> | <b>Rsc9</b>           | -                                                                                    | +           | +           | (-)         | +            | +           | +           | +           | -           | -            |

**Supplementary Table S3** Overview comparison of our data (Wippo *et al.*) with data from the indicated sources for effects on nucleosome occupancy upon ablation of the indicated RSC subunit and for binding of the indicated RSC subunit (compare Supplementary Figure S4 and Supplementary Table S4). The table summarizes the respective data as following: +, clear effect/binding; -, no effect/binding; (+), weak effect; (-), very weak effect/binding; n.d., not determined.

| Locus        | Ng <i>et al.</i> (2002)<br>RSC (Rsc1/2/8 and<br>Sth1) occupancy<br>(p-val) | Damelin <i>et al.</i> (2002)<br>Rsc9 Occupancy<br>(Median Percentile) | Floer <i>et al.</i> (2010)<br>RSC/Nucleosome peaks<br>(Location relative to ATG) |
|--------------|----------------------------------------------------------------------------|-----------------------------------------------------------------------|----------------------------------------------------------------------------------|
| <i>PHO8</i>  | <b>6.33E-08</b>                                                            | 48.7                                                                  | <b>-520 / -269 / +362 / +1438</b>                                                |
| <i>RIM9</i>  | <b>4.34E-05</b>                                                            | <b>93.0</b>                                                           | none                                                                             |
| <i>CHA1</i>  | 5.88E-01                                                                   | <b>96.4</b>                                                           | none                                                                             |
| <i>SNT1</i>  | 7.18E-01                                                                   | 71.6                                                                  | none                                                                             |
| <i>GAL10</i> | 3.18E-01                                                                   | <b>94.5</b>                                                           | <b>-275 / +1002</b>                                                              |
| <i>RIO1</i>  | <b>1.27E-06</b>                                                            | <b>95.5</b>                                                           | +1251                                                                            |
| <i>ADH2</i>  | 7.87E-01                                                                   | <b>80.2</b>                                                           | +144 / +522 / +814                                                               |
| <i>RNR3</i>  | 1.03E-01                                                                   | <b>86.4</b>                                                           | -652 / +191 / +488                                                               |
| <i>PHO5</i>  | 3.55E-01                                                                   | 37.1                                                                  | +612                                                                             |
| <i>PHO84</i> | 5.99E-01                                                                   | 40.5                                                                  | none                                                                             |

**Supplementary Table S4** RSC binding scores obtained by Ng *et al.* (2002) (combined p-value for the Rsc1, Rsc2, Rsc3, Rsc8 and Sth1 ChIPs; significant values in bold) and Damelin *et al.* (2002) (promoters above the 71st / 72nd median percentile were classified as bound by RSC; significant values in bold) as well as the location of RSC-bound nucleosomes reported by Floer *et al.* (2010) (locations within promoter regions in bold).

## Supplementary Materials and Methods

### Strains

Disruption of *PHO4* yielding the mutants *rsc3-ts pho4* and *arp9-ts pho4* was by transformation with a linear DNA fragment of the *PHO4* locus with a *URA3* marker gene cassette inserted into the *PHO4* ORF.

### Plasmids

Plasmid pUC19-*PHO8*-short was used to assay samples from the WCE fractionation (Figure 1C), and was prepared by inserting a 2.7 kb PCR fragment generated with primers 5'-GGCCTGCAGAGTTAGATAGGATCAG-3' and 5'-CCGGATCCTCTTTCTCAGTAAGAG-3' and pP8apin (Hertel et al, 2005) as template via PstI and BamHI into pUC19. Plasmids used for generating all markers and for *in vitro* reconstitutions in Figures 2-4 and Supplementary Figure 2 were constructed by inserting respective 3.5 kb PCR fragments amplified with genomic DNA from strain BY4741 as template into the multiple cloning site of pUC19. The following primers and restriction enzymes were used:

pUC19-*PHO8*-long: 5'-CCATGTGCATAGGATCCGGACGTTTGCCATAGTGTTG-3' and 5'-CAGTCAGACGCTGCAGGGGAGAGTTAGATAGGATCAGT-3' via BamHI and PstI;

pUC19-*RIM9*: 5'-CATGTTCGATTGAGCTCGCATCTTCTGCAACGCCTTG-3' and 5'-CAGTCAGTAAGGATCCCAGTGGATAGATTTCCGGAG-3' via SacI and BamHI;

pUC19-*CHA1*: 5'-CCATGTGCATTGGTACCTCTCAAAGTATTCGACCAC-3' and 5'-CAGTCAGTAATCTAGACAAGGGCAAATTGATGCTTC-3' via KpnI and XbaI;

pUC19-*SNT1*: 5'-CAGTCAAGCGTCTAGAAATGAGCGCAGAGCTATCAC-3' and 5'-CTCTGTGCATTCTGCAGGAGTGTTGCGGATTGGATC-3' via XbaI and PstI;

pUC19-*RIO1*: 5'-CAGTCGGATGGAGCTCACTTCTATTGGCTTAGGAGC-3' and 5'-CACTGTGCATTTCTAGAACGACGAAGACGAGGATTAG-3' via SacI and XbaI;

pUC19-*RNR3*: 5'-CACTGTGCATTTCTAGACATCCAAGTGGTCAAGGGGT-3' and 5'-CGTTCGTCTGGTCGACTCTTCCTGTTACATGCGTCC-3' via XbaI and Sall.

pUC19-*PHO5*: 5'-CCATGTGCTACGAATTCTCCTGTCCTTGTATTCGTCC-3' and 5'-CAGTCAGACGAAGCTTACTACAGGGATTGAAACATCC-3' via EcoRI and HindIII.

pUC19-*ADH2*: 5'-CCATGTGCATTGGTACCCGCTGTTATGTTCAAGGTCC-3' and 5'-CAGTCAGACGCTGCAGATCCTCAATCCAAGGCGAAC-3' via KpnI/PstI.

pUC19-*PHO84* was as described (Wippo et al, 2009). The sequence of each entire insert was confirmed by dideoxy sequencing (data not shown).

### **Yeast whole cell extract (WCE) fractionation**

Ten 1 ml aliquots of WCE were supplemented each with 176,5 mg of ammonium sulphate, and rotated in a wheel at 4 °C until all ammonium sulphate was dissolved (corresponding to 30% saturation). After centrifugation for 30 min at 4 °C at 26000 rpm (max RCF of 41500) in a Beckmann TLA55 rotor the supernatants were transferred to fresh tubes and another 92,4 mg each of ammonium sulphate were added to achieve 45% saturation. After centrifugation as before, the supernatants (“SN fraction”) were pooled in a fresh tube. The pellets from the first centrifugation step (“30% fraction”) were resuspended in 5 ml of Basic Buffer (80 mM KCl, 20 mM Hepes-KOH pH 7.5, 10 % glycerol, 5 mM DTT, 0.1 mM phenylmethylsulfonyl fluoride and 1 mM sodium metabisulfite). The pellets from the second centrifugation step (“45% fraction”) were resuspended in 5 ml Basic Buffer plus 1 M ammonium sulphate. The “30% fraction” and the “SN fraction” as well as 500 µl of the “45 % fraction” were exhaustively dialysed against Basic Buffer. A 5 ml HP Phenyl Sepharose FF low-sub column (GE Healthcare) was equilibrated with Basic Buffer plus 1 M ammonium sulphate and loaded with the remaining 4.5 ml of the “45% fraction”. The flow-through was collected and the column was step-eluted with Basic Buffer containing 500 or 200 or no ammonium sulphate. All fractions were exhaustively dialysed against Basic Buffer. Three 1 ml Heparin HP columns (GE Healthcare) were connected in series, equilibrated with Basic Buffer, and loaded with the 500 mM ammonium sulphate fraction from the Phenyl Sepharose column. The flow-through was collected, and further fractions obtained by step-elution with Basic Buffer plus 200mM, 400mM and 1000mM KCl, respectively. All fractions except for the flow-through were dialysed exhaustively against Basic Buffer. A 1 ml DEAE FF (GE Healthcare) column was equilibrated with Basic Buffer and loaded with the 400 mM KCl fraction from the Heparin column and the flow-through collected. The column was eluted step-wise with Basic Buffer plus 150mM, 350mM and 500mM KCl, respectively. All fractions except for the flow-through were exhaustively dialysed against Basic Buffer.



## Mass Spectrometry

Slices from SDS-PAGE gels were washed twice with water and twice with 40 mM ammoniumbicarbonate each for 30 min. After two-times treatment with 50% acetonitrile for 5 min, trypsin (enzyme/protein ratio 1:20-1:100) (Sequencing Grade Modified, Promega) was added and proteins were digested overnight in 40 mM ammoniumbicarbonate at 37 °C while shaking (600 rpm). For protein identification probes/peptides were purified (desalted) using C18 ZipTips<sup>®</sup> (Millipore) prior to nano-ESI-LC-MS/MS. Each sample was then separated on a C18 reversed phase column via a linear acetonitrile gradient (UltiMate 3000 system (Dionex) and column (75 µm i.d. x 15 cm, packed with C18 PepMap<sup>™</sup>, 3 µm, 100 Å (LC Packings)) before MS and MS/MS spectra were recorded on an Orbitrap mass spectrometer (Thermo Fisher Scientific). The resulting spectra were analyzed via the Mascot<sup>™</sup> Software (Matrix Science) using the Swiss-Prot Protein Database.

## Indirect end labeling and restriction enzyme accessibility analysis

Secondary cleavage for DNaseI indirect end labeling was with the following restriction enzymes: *PHO8*: BglII, *PHO5*: ApaI, *RIM9*: HpaI, *CHAI*: BamHI, *SNT1*: SspI, *RIO1*: HpaI (Figure S6) or BamHI (Figure S7E), *RNR3*: PstI, *GALI0*: HpaI, *ADH2*: HindIII and *PHO84*: SspI. For restriction enzyme accessibility assays at the *PHO8* promoter samples were digested with BglII and EcoRV. The probes for DNaseI indirect end labeling and restriction enzyme assays were generated by PCR using the following primers and either a pUC19 plasmid carrying the corresponding locus (were available) or genomic yeast DNA as template. *PHO8*: 5'-GACGGATCTCGAAGAGATCA-3' and 5'-CCTGCCATCTGTAATCAACA-3'; *PHO5*: 5'-GTCTTCAGCGTCAACTTTAG-3' and 5'-GCCAATGTGCAGTAGTAACT-3'; *PHO84*: 5'-CCTTGAGAACTTCAGTTGAC-3' and 5'-GAGTGAAGGCCATCAAATC-3'; *RIM9*: 5'-GTGACCGAGTTAGCACAACC-3' and 5'-CATTGCTTCAACGCTCGAAG-3'; *CHAI*: 5'-CATGTCAAAGACTGTCTCTAC-3' and 5'-CCATACCTTTCCAAACCTTG-3'; *SNT1*: 5'-TGAAAAGAACAGGTCCGTCG-3' and 5'-CGAAATTAATCATGTCCCAG-3'; *RIO1* (Figure S6): 5'-CTAAACTCATTGGATGTTCA-3' and 5'-GTCTTAGATCCGAGAACTAT-3'; *RIO1* (Figure S7E): 5'-CTTCATACTGGCCTGTTTCC-3' and 5'-TTGTCTGTGTCGCAAGGTGC-3'; *RNR3*: 5'-TGCTCCTATGATTTCCGACG-3' and 5'-GATAGAGTCATCCTTCATGGC-3';

*ADH2*: 5'-AGAATACGCTACCGCTGACG-3' and 5'-ATTGATGATACCGTGGGCAC-3';  
*GAL10*: 5'-TCTGCAACGACCGTAATACG-3' and 5'-GGAAGTTCGATTTGCCGTTG-3'.

### **Markers**

Marker fragments were generated by digesting the pUC19 plasmids carrying the corresponding locus with the following combinations of restriction enzymes:

*PHO8*: SacI/BglII, HindIII/BglII, EcoRV/BglII; NdeI/BglII;

*RIM9*: NheI/HpaI, SphI/HpaI, BglII/DraI, XbaI/NsiI;

*CHA1*: NciI/BamHI, HindIII/BamHI, EcoRV/BamHI, HaeII/BamHI;

*SNT1*: KpnI/SspI, MspI/SspI, SacI/SspI, SpeI/SspI;

*RIO1*: FokI/BamHI, NciI/BamHI, DraI/BamHI, HhaI/BamHI;

*RNR3*: BanII/PstI, AvaII/PstI, ApaI/PstI, ClaI/PstI;

*PHO5*: DraI/ApaI, ClaI/ApaI, BamHI/ApaI, FokI/ApaI;

*ADH2*: EcoRV/HindIII, SphI/HindIII, DpnI/HindIII, SacI/HindIII;

*PHO84*: ClaI/SspI, AgeI/SspI, ApaI/SspI, BsrBI/SspI;

*GAL10*: AgeI/HpaI, AvaI/HpaI, EcoRI/HpaI.

### **Preparation of figures**

Hybridized Southern blots were exposed to X-ray films (Fuji Super RX) at  $-80^{\circ}\text{C}$  using intensifier screens (DuPont, Lightning Plus). If individual lanes differed significantly in signal strength, blots were exposed for varying times. Films were scanned in grey-scale modus (MikroTek ScanMaker i900) and image files imported in Adobe Photoshop CS2. Scan images of lanes from films with different exposure times were combined within one figure in order to obtain more even signal strength across the figure. All plots and images were imported in CorelDraw X3 for final figure layout.

## Supplementary References

Badis G, Chan ET, van Bakel H, Pena-Castillo L, Tillo D, Tsui K, Carlson CD, Gossett AJ, Hasinoff MJ, Warren CL, Gebbia M, Talukder S, Yang A, Mnaimneh S, Terterov D, Coburn D, Li Yeo A, Yeo ZX, Clarke ND, Lieb JD, Ansari AZ, Nislow C, Hughes TR (2008) A library of yeast transcription factor motifs reveals a widespread function for Rsc3 in targeting nucleosome exclusion at promoters. *Mol Cell* **32**: 878-887

Barbaric S, Fascher KD, Horz W (1992) Activation of the Weakly Regulated PHO8 Promoter in *Saccharomyces-Cerevisiae* - Chromatin Transition and Binding-Sites for the Positive Regulatory Protein Pho4. *Nucleic Acids Research* **20**: 1031-1038

Damelin M, Simon I, Moy TI, Wilson B, Komili S, Tempst P, Roth FP, Young RA, Cairns BR, Silver PA (2002) The genome-wide localization of Rsc9, a component of the RSC chromatin-remodeling complex, changes in response to stress. *Mol Cell* **9**: 563-573

Floer M, Wang X, Prabhu V, Berrozpe G, Narayan S, Spagna D, Alvarez D, Kendall J, Krasnitz A, Stepansky A, Hicks J, Bryant GO, Ptashne M (2010) A RSC/nucleosome complex determines chromatin architecture and facilitates activator binding. *Cell* **141**: 407-418

Ghaemmaghami S, Huh WK, Bower K, Howson RW, Belle A, Dephoure N, O'Shea EK, Weissman JS (2003) Global analysis of protein expression in yeast. *Nature* **425**: 737-741

Hartley PD, Madhani HD (2009) Mechanisms that Specify Promoter Nucleosome Location and Identity. *Cell* **137**: 445-458

Hertel CB, Langst G, Horz W, Korber P (2005) Nucleosome stability at the yeast PHO5 and PHO8 promoters correlates with differential cofactor requirements for chromatin opening. *Molecular and Cellular Biology* **25**: 10755-10767

Jiang C, Pugh BF (2009) A compiled and systematic reference map of nucleosome positions across the *Saccharomyces cerevisiae* genome. *Genome Biol* **10**: R109

Ng HH, Robert F, Young RA, Struhl K (2002) Genome-wide location and regulated recruitment of the RSC nucleosome-remodeling complex. *Genes Dev* **16**: 806-819

Parnell TJ, Huff JT, Cairns BR (2008) RSC regulates nucleosome positioning at Pol II genes and density at Pol III genes. *Embo Journal* **27**: 100-110

Szerlong H, Saha A, Cairns BR (2003) The nuclear actin-related proteins Arp7 and Arp9: a dimeric module that cooperates with architectural proteins for chromatin remodeling. *EMBO J* **22**: 3175-3187

Venters BJ, Pugh BF (2009) A canonical promoter organization of the transcription machinery and its regulators in the *Saccharomyces* genome. *Genome Res* **19**: 360-371

Wippo CJ, Krstulovic BS, Ertel F, Musladin S, Blaschke D, Sturzl S, Yuan GC, Horz W, Korber P, Barbaric S (2009) Differential Cofactor Requirements for Histone Eviction from Two Nucleosomes at the Yeast PHO84 Promoter Are Determined by Intrinsic Nucleosome Stability. *Molecular and Cellular Biology* **29**: 2960-2981
